1 **Effect of salinity on modulation by ATP, protein kinases and FXD2 peptide of gill**  
2 **(Na<sup>+</sup>, K<sup>+</sup>)-ATPase activity in the swamp ghost crab *Ucides cordatus* (Brachyura,**  
3 **Ocypodidae)**

4

5 Francisco A. Leone<sup>1,\*</sup>; Malson N. Lucena<sup>4</sup>; Leonardo M. Fabri<sup>1</sup>; Daniela P. Garçon<sup>5</sup>; Carlos  
6 F.L. Fontes<sup>6</sup>; Rogério O. Faleiros<sup>7</sup>; Cintya M. Moraes<sup>1</sup>; John C. McNamara<sup>2,3</sup>

7

8 <sup>1</sup>Departamento de Química, and <sup>2</sup>Departamento de Biologia, Faculdade de Filosofia, Ciências  
9 e Letras de Ribeirão Preto, Universidade de São Paulo, Ribeirão Preto, SP; <sup>3</sup>Centro de  
10 Biologia Marinha, Universidade de São Paulo, São Sebastião, SP; <sup>4</sup>Instituto de Biociências,  
11 Universidade Federal do Mato Grosso do Sul, Campo Grande, MS; <sup>5</sup>Universidade Federal do  
12 Triângulo Mineiro, Iturama, MG; <sup>6</sup>Instituto de Bioquímica Médica, Universidade Federal do  
13 Rio de Janeiro; <sup>7</sup>Departamento de Ciências Agrárias e Biológicas, Universidade Federal do  
14 Espírito Santo, São Mateus, ES.

15

16 **Running title:** Gill (Na<sup>+</sup>, K<sup>+</sup>)-ATPase activity in salinity-acclimated *Ucides cordatus*

17

18 \*Corresponding author: Francisco A. Leone – Senior Professor at the Departamento de  
19 Química – Faculdade de Filosofia, Ciências e Letras de Ribeirão Preto/Universidade de São  
20 Paulo. Avenida Bandeirantes 3900. Ribeirão Preto 14040-901, SP. Brasil. Tel.: +5516  
21 33153668. E-mail: fdaleone@ffclrp.usp.br.

22

23

24

24 **ABSTRACT**

25           The gill (Na<sup>+</sup>, K<sup>+</sup>)-ATPase is the main enzyme that underpins osmoregulatory ability  
26 in crustaceans that occupy biotopes like mangroves, characterized by salinity variation. We  
27 evaluated osmotic and ionic regulatory ability in the semi-terrestrial mangrove crab *Ucides*  
28 *cordatus* after 10-days acclimation to different salinities. We also analyzed modulation by  
29 exogenous FXYD2 peptide and by endogenous protein kinases A and C, and Ca<sup>2+</sup>-  
30 calmodulin-dependent kinase of (Na<sup>+</sup>, K<sup>+</sup>)-ATPase activity. Hemolymph osmolality was  
31 strongly hyper-/hypo-regulated in crabs acclimated at 2 to 35 ‰. Cl<sup>-</sup> was well hyper-/hypo-  
32 regulated although Na<sup>+</sup> much less so, becoming iso-natremic at high salinity. (Na<sup>+</sup>, K<sup>+</sup>)-  
33 ATPase activity was greatest in isosmotic crabs (26 ‰), diminishing progressively from 18  
34 and 8 ‰ (≈0.5 fold) to 2 ‰ (0.04-fold), and decreasing notably at 35 ‰ (0.07-fold). At  
35 low salinity, the (Na<sup>+</sup>, K<sup>+</sup>)-ATPase exhibited a low affinity ATP-binding site that showed  
36 Michaelis-Menten behavior. Above 18 ‰, an additional, high affinity ATP-binding site,  
37 corresponding to 10-20% of total (Na<sup>+</sup>, K<sup>+</sup>)-ATPase activity appeared. Activity is stimulated  
38 by exogenous pig kidney FXYD2 peptide, while endogenous protein kinases A and C and  
39 Ca<sup>2+</sup>/calmodulin-dependent kinase all inhibit activity. This is the first demonstration of  
40 inhibitory phosphorylation of a crustacean (Na<sup>+</sup>, K<sup>+</sup>)-ATPase by Ca<sup>2+</sup>/calmodulin-dependent  
41 kinase. Curiously, hyper-osmoregulation in *U. cordatus* shows little dependence on gill (Na<sup>+</sup>,  
42 K<sup>+</sup>)-ATPase activity, suggesting a role for other ion transporters. These findings reveal that  
43 the salinity acclimation response in *U. cordatus* consists of a suite of osmoregulatory and  
44 enzymatic adjustments that maintain its osmotic homeostasis in a challenging, mangrove  
45 forest environment.

46

47 **Keywords:** salinity acclimation; osmotic and ionic regulation; crab gill (Na<sup>+</sup>, K<sup>+</sup>)-ATPase;  
48 FXYD2 peptide; protein kinase

49

50

51

52

53

54

55

56 Graphical abstract

57

58

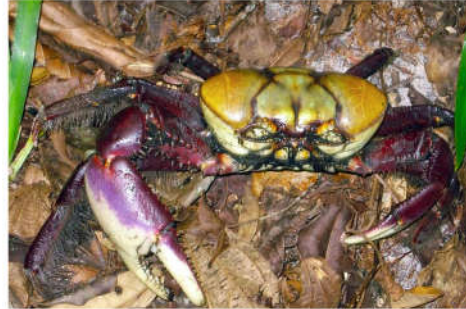

Photo: Marcos Antonio Pinto

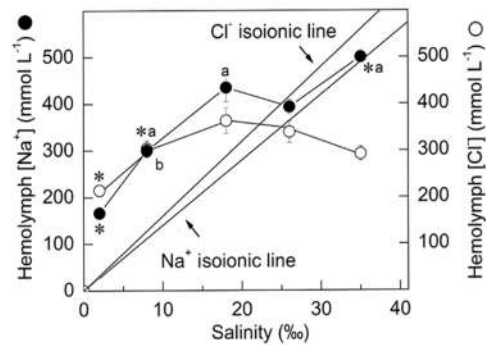

59

60

61

## 62 Highlights

63 1. Gill (Na<sup>+</sup>, K<sup>+</sup>)-ATPase activity is greatest in isosmotic crabs, diminishing in lower and  
64 higher salinities.

65 2. A high affinity ATP-binding site (10-20% of total activity) is exposed above 18 ‰S.

66 3. Exogenous FXYD2 peptide stimulates activity; endogenous PKA, PKC and CaMK inhibit  
67 activity.

68 4. First demonstration of inhibitory phosphorylation of crustacean (Na<sup>+</sup>, K<sup>+</sup>)-ATPase by  
69 CaMK.

70 5. Hyper-osmoregulation shows little dependence on (Na<sup>+</sup>, K<sup>+</sup>)-ATPase activity.

71

## 71 1. INTRODUCTION

72 The gills, antennal glands and intestine participate in ion transport in osmoregulating  
73 crustaceans (Péqueux, 1995; Freire et al., 2008). In particular, the gills constitute a vital,  
74 multi-functional, organ effector system that contributes simultaneously to osmotic, ionic,  
75 excretory, acid-base and respiratory homeostasis (Taylor and Taylor, 1992; Péqueux, 1995;  
76 Lucu and Towle, 2003; Freire et al., 2008; Henry et al., 2012). Various enzymes including the  
77 (Na<sup>+</sup>,K<sup>+</sup>)-ATPase, V(H<sup>+</sup>)-ATPase and carbonic anhydrase, and ion transporters such as the  
78 Cl<sup>-</sup>/HCO<sub>3</sub><sup>-</sup> and Na<sup>+</sup>/H<sup>+</sup> exchangers and Na<sup>+</sup>/K<sup>+</sup>/2Cl<sup>-</sup> symporter, participate in the translocation  
79 of ions across crustacean gill epithelia (McNamara and Faria, 2012). Although its role in  
80 osmoregulation varies depending on the organism and its habitat, the (Na<sup>+</sup>, K<sup>+</sup>)-ATPase,  
81 particularly abundant in the cell membrane invaginations of the gill epithelial ionocytes  
82 (Towle and Kays, 1986; Taylor and Taylor, 1992; McNamara and Torres, 1999), is the main  
83 enzyme that underpins osmoregulatory ability (Lee et al., 2011).

84 The (Na<sup>+</sup>, K<sup>+</sup>)-ATPase is a ubiquitously expressed, integral membrane protein that  
85 couples the exchange of two extracellular K<sup>+</sup> ions for three intracellular Na<sup>+</sup> ions linked to the  
86 hydrolysis of a single ATP molecule (Albers, 1967; Post et al., 1972). This exchange  
87 establishes an electrochemical gradient of these ions across the plasma membrane,  
88 indispensable for many cell functions (Meier et al., 2010). The oligomeric (Na<sup>+</sup>, K<sup>+</sup>)-ATPase  
89 is a member of the P<sub>2C</sub> subfamily of the P-type ATPase transporter family, and consists of an  
90 α-, a β- and a γ-subunit (Geering, 2001). The catalytic α-subunit hydrolyses ATP and  
91 transports the cations, while the β-subunit plays a crucial role in the structural and functional  
92 maturation of the α-subunit, and in modulating its transport properties (Kaplan, 2002; Morth  
93 et al., 2007). The γ-subunit is a short, single-span membrane protein belonging to the FXYD  
94 peptide family that interacts specifically with the Glu<sub>953</sub>, Phe<sub>949</sub>, Leu<sub>957</sub> and Phe<sub>960</sub> residues of  
95 the M9 transmembrane α-helix (Morth et al., 2007; Shinoda et al., 2009), and regulates the  
96 kinetic behavior of the (Na<sup>+</sup>, K<sup>+</sup>)-ATPase depending on cell type, tissue and physiological  
97 state (Morth et al., 2007; Geering, 2008; Shinoda et al., 2009). Its docking site on the α-  
98 subunit is highly conserved among the different ATPases, since different FXYD peptides can  
99 bind during P-type ATPase regulation (Morth et al., 2007; Geering, 2008; Shinoda et al.,  
100 2009). FXYD2 was the first FXYD protein to be linked to the (Na<sup>+</sup>, K<sup>+</sup>)-ATPase (Forbush et  
101 al., 1978). It is expressed predominantly in the mammalian kidney (Mercer et al., 1993),  
102 increases V<sub>max</sub> and Na<sup>+</sup> affinity without affecting ATP affinity (Cortes et al., 2006; Geering,  
103 2006; 2008), and is a functional constituent of the *Callinectes danae* (Na<sup>+</sup>, K<sup>+</sup>)-ATPase (Silva

104 [et al., 2012](#)). Interaction of different FXYD peptides with the (Na<sup>+</sup>, K<sup>+</sup>)-ATPase increases  
105 enzyme versatility and constitutes an important mechanism for regulating osmotic  
106 homeostasis in fish and aquatic crustaceans ([Wang et al., 2008](#); [Tipsmark et al., 2010](#); [Yang et](#)  
107 [al., 2013, 2019a](#)).

108 The (Na<sup>+</sup>, K<sup>+</sup>)-ATPase occurs in two main conformational states, E1 and E2, both  
109 phosphorylated at the D<sub>369</sub> aspartate residue in which E1P shows high affinity for intracellular  
110 Na<sup>+</sup> while the E2P state shows high affinity for extracellular K<sup>+</sup>; the binding of K<sup>+</sup> accelerates  
111 dephosphorylation of the E2P form ([Morth et al., 2009](#); [Clausen et al., 2017](#)). Analysis of the  
112 E1·AlF<sub>4</sub><sup>-</sup>·ADP·3Na<sup>+</sup> crystal structure from pig kidney (Na<sup>+</sup>, K<sup>+</sup>)-ATPase suggests that the  
113 M5 α-helix mediates coupling between the ion- and nucleotide-binding sites (Kanai et al.,  
114 2013). Crystallographic studies revealed either low- or high-affinity ATP binding sites present  
115 in the N-domain depending on conformational state ([Morth et al., 2007](#); [Shinoda et al., 2009](#);  
116 [Chourasia and Sastry, 2012](#); [Nyblom et al., 2013](#)). The E1 conformation binds ATP with high  
117 affinity in the presence of Na<sup>+</sup> ([Kanai et al., 2013](#); [Nyblom et al., 2013](#)) while the E2  
118 conformation binds ATP with low affinity in the presence of K<sup>+</sup> ([Morth et al., 2007](#); [Shinoda](#)  
119 [et al., 2009](#)). Na<sup>+</sup>-like substances such as Tris<sup>+</sup> induce exposure of the high affinity ATP-  
120 binding site ([Middleton et al., 2015](#); [Jiang et al., 2017](#)). However, despite nucleotide binding  
121 with an efficiency similar to Na<sup>+</sup>, the enzyme does not assume the Na<sup>+</sup>-like E1 form  
122 ([Middleton et al., 2015](#)).

123 (Na<sup>+</sup>, K<sup>+</sup>)-ATPase activity can be regulated by phosphorylation ([Beguin et al., 1994](#);  
124 [Cheng et al., 1999](#); [Pearce et al., 2010](#)), and both cAMP-dependent protein kinase A (PKA)  
125 and Ca<sup>2+</sup>-dependent protein kinase C (PKC) can phosphorylate the α-subunit ([Beguin et al.,](#)  
126 [1996](#); [Pearce et al., 2010](#); [Poulsen et al., 2010](#)) leading to activity inhibition. The N-terminal  
127 domain of the (Na<sup>+</sup>, K<sup>+</sup>)-ATPase is phosphorylated by PKA ([Beguin et al., 1994](#); [1996](#)) but  
128 the only well-characterized phosphorylation target known in the enzyme structure is the Ser<sub>943</sub>  
129 residue in NKAA1, present in a short helical segment between transmembrane α-helices M8  
130 and M9, which is a putative PKA phosphorylation site ([Poulsen et al., 2010](#)). Phosphorylation  
131 of the α1-subunit of the (Na<sup>+</sup>, K<sup>+</sup>)-ATPase by the main alpha, beta and gamma PKC isoforms  
132 leads to activity inhibition ([Kazaniets et al., 2001](#)) as does phosphorylation of rat kidney α1,  
133 α2 and α3 subunits ([Blanco et al., 1998](#)). Phosphorylation of Ser<sub>23</sub> in rat (Na<sup>+</sup>, K<sup>+</sup>)-ATPase  
134 α1-transfected renal COS cells by PKC leads to intracellular Na<sup>+</sup> accumulation and inhibition  
135 of both ATP hydrolysis and Rb<sup>+</sup> transport ([Belusa et al., 1997](#)). However, in cells transfected  
136 with Ser<sub>23</sub> to Ala<sub>23</sub> α1-mutants, the (Na<sup>+</sup>, K<sup>+</sup>)-ATPase cannot be phosphorylated by PKC

137 (Poulsen et al., 2010). Phosphorylation of rat ( $\text{Na}^+$ ,  $\text{K}^+$ )-ATPase  $\alpha$ -subunit by an endogenous  
138  $\text{Ca}^{2+}$ /calmodulin-dependent protein kinase (CaMK) inhibits catalytic activity significantly  
139 (Netticadan et al., 1997) and constitutes part of a mechanism mediating  $\text{Ca}^{2+}$  effects on the  
140 enzyme (Yingst et al., 1992; Lu et al., 2016).

141 Euryhaline crabs exhibit adjustments in gill ( $\text{Na}^+$ ,  $\text{K}^+$ )-ATPase activity and  $\alpha$ -subunit  
142 mRNA expression in response to salinity change (Lovett et al., 2006a; Serrano et al., 2007;  
143 Masui et al., 2009; Garçon et al., 2009; Faleiros et al., 2018). The effects of reduced salinity  
144 on gill ( $\text{Na}^+$ ,  $\text{K}^+$ )-ATPase activities have been investigated in the blue crabs *Callinectes*  
145 *ornatus* (Garçon et al., 2009; Leone et al., 2015), *C. danae* (Masui et al., 2009) and *C. sapidus*  
146 (Lovett et al., 2006b; Serrano et al., 2007), the hermit crab *C. symmetricus* (Faleiros et al.,  
147 2018; and Lucena et al., 2012; Antunes et al., 2017 as *C. vittatus*) and the estuarine crab  
148 *Neohelice granulata* (Castilho et al., 2001; Genovese et al., 2004; Luquet et al., 2002; 2005).  
149 However, it is not clear whether the consequent increases in ( $\text{Na}^+$ ,  $\text{K}^+$ )-ATPase activity result  
150 from enzyme activation, synthesis and recruitment of new protein to the cell membrane  
151 (Henry et al., 2002) or from adjustment of transport activity through regulatory  
152 phosphorylation (Silva et al., 2012).

153 *Ucides cordatus* (Linnaeus 1763) is a mangrove crab known as the swamp ghost crab  
154 or ‘caranguejo-uçá’ in Brazil and is one of two species of *Ucides* belonging to the family  
155 *Ucididae* (Melo, 1996). It plays an ecologically relevant role in nutrient recycling and  
156 substrate bioturbation (Nordhaus and Wolff, 2007; Nordhaus et al., 2009). The crab inhabits  
157 mangrove forests on western Atlantic Ocean shores and is distributed from Florida to  
158 southern Uruguay (Coelho and Ramos, 1972). This semi-terrestrial brachyuran exhibits a  
159 modest degree of terrestriality, absorbing water from moist substrates to compensate for loss  
160 due to desiccation and urinary excretion (Hartnoll, 1988). *Ucides cordatus* confronts  
161 substantial fluctuations in salinity, from 8 to 33 ‰, owing to tides, frequent rain and high  
162 temperatures (Santos and Salomão, 1985a) and is a strong hyper-/hypo-osmoregulator  
163 (Martinez et al., 1999), exhibiting a hemolymph osmolality of from 700 to 800 mOsm  $\text{kg}^{-1}$   
164  $\text{H}_2\text{O}$ . Salt is taken up from the external medium below 26 ‰ but is secreted in more  
165 concentrated media (Santos and Salomão, 1985a, 1985b). Hemolymph  $[\text{Na}^+]$  ranges from 300  
166 to 390  $\text{mmol L}^{-1}$  in salinities above 34 ‰ (Santos and Salomão, 1985b). Acclimation of  
167 submerged *U. cordatus* to dilute seawater increases ( $\text{Na}^+$ ,  $\text{K}^+$ )-ATPase activity by  $\approx 1.5$ -fold in  
168 the posterior gills and by  $\approx 2$ -fold in the antennal glands (Harris and Santos, 1993b). However,  
169 while osmoregulatory ability seems well characterized, little is known of the biochemical  
170 processes underlying ion transport in *U. cordatus* gills.

171 Here, we evaluate the osmotic and ionic regulatory abilities of *U. cordatus* after 10  
172 days acclimation to hypo-, iso- or hyper-osmotic salinities, and we analyze the kinetic  
173 behavior of the posterior gill ( $\text{Na}^+$ ,  $\text{K}^+$ )-ATPase. We also evaluate the regulation of gill  
174 enzyme activity *in vitro* by the endogenous protein kinases PKA, PKC and CaMK, and by  
175 exogenous FXYD2 peptide, aiming to further elucidate osmoregulatory mechanisms in semi-  
176 terrestrial crustaceans.

177

## 178 **2. MATERIALS AND METHODS**

### 179 **2.1. Material**

180 All solutions were prepared using Millipore MilliQ ultrapure, apyrogenic water with a  
181 resistivity of 18.2 M $\Omega$  cm. Tris (hydroxymethyl) amino methane, ATP di-Tris salt, NADH,  
182 pyruvate kinase (PK), phosphoenol pyruvate (PEP), imidazole, N-(2-hydroxyethyl)  
183 piperazine-N'-ethanesulfonic acid (HEPES), lactate dehydrogenase (LDH), sucrose, ouabain,  
184 KN62, H89, Phorbol-12-myristate 13-acetate (PMA), phosphatidyl serine (PS), bovine serum  
185 albumin, dibutyl cAMP (db-cAMP), dithiothreitol (DTT), ethylene glycol tetraacetic acid  
186 (EGTA), chelerythrine, alamethicin, theophylline, calmodulin (CaM), thapsigargin,  
187 aurovertin, ethacrynic acid, ethylene diamine tetraacetic acid (EDTA), bafilomycin A<sub>1</sub>, S-  
188 diphenylcarbazone and sodium orthovanadate, were purchased from the Sigma Chemical  
189 Company (Saint Louis, USA). Ethanol, dimethyl sulfoxide (DMSO), mercury nitrate, and  
190 triethanolamine (TEA) were from Merck (Darmstadt, Germany). The protease inhibitor  
191 cocktail (1 mmol L<sup>-1</sup> benzamidine, 5  $\mu\text{mol L}^{-1}$  antipain, 5  $\mu\text{mol L}^{-1}$  leupeptin, 1  $\mu\text{mol L}^{-1}$   
192 pepstatin A and 5  $\mu\text{mol L}^{-1}$  phenyl-methane-sulfonyl-fluoride) was from Calbiochem  
193 (Darmstadt, Germany). Ammonium sulfate-depleted PK, LDH suspensions and stock  
194 solutions of ATP, bafilomycin A<sub>1</sub> and sodium orthovanadate were prepared according to  
195 [Lucena et al. \(2012\)](#). When necessary, enzyme solutions were concentrated on YM-10  
196 Amicon Ultra filters. All cations were used as chloride salts.

197

### 198 **2.2. Crab collections**

199 Adult male and non-ovigerous female *U. cordatus* measuring 8-9 cm in carapace  
200 width were caught by hand from the Barra Seca mangrove (23° 24' 58.9" S, 45° 03' 02.9" W)  
201 in Ubatuba, São Paulo State, Brazil, during four collections made between 2015 and 2016,  
202 under ICMBio/MMA permit #29594-9 to JCM. The crabs were transported individually to the  
203 laboratory in transparent, closed plastic boxes (20×20×20 cm) containing a 3-cm deep layer of  
204 brackish water from the collection site. Before salinity acclimation in the laboratory, the crabs



205 were maintained in their boxes for 24 h at 26 ‰S ( $\text{g L}^{-1}$ , salinity) and  $\approx 25$  °C, under a natural  
206 photoperiod of 14 h light: 10 h dark.

207

### 208 **2.3. Experimental design and salinity acclimation**

209 For each salinity tested, six to eight intermolt crabs were acclimated individually to  
210 either 2, 8, 18, 26 or 35 ‰S in transparent closed plastic boxes (20×20×20 cm) containing a  
211 3-cm deep layer of experimental medium, for 10 days at  $\approx 25$  °C, under a natural photoperiod  
212 of 14 h light: 10 h dark. The reference salinity was 26 ‰S. Salinity was adjusted by the  
213 addition of Tropic Marin sea salt to chlorine-free tap water (<0.5 ‰S). Salinities were  
214 checked daily during the acclimation period using an Atago refractometer (Warszawa,  
215 Poland). The experimental media were changed daily during the experiments, and the crabs  
216 were fed on alternate days with pieces of shrimp or fish. Uneaten food fragments were  
217 removed the following morning.

218

### 219 **2.4. Preparation of the gill microsomal fraction**

220 For each microsomal preparation, six to eight crabs were anesthetized by chilling in crushed  
221 ice for 5 min and then killed by quickly transecting the ventral ganglion with scissors and  
222 removing the carapace. The three posterior gill pairs ( $\approx 0.75$  g wet weight) were rapidly  
223 excised and placed in 80 mL ice-cold homogenization buffer (20  $\text{mmol L}^{-1}$  imidazole buffer,  
224 pH 6.8, containing 250  $\text{mmol L}^{-1}$  sucrose, 6  $\text{mmol L}^{-1}$  EDTA and the protease inhibitor  
225 cocktail (Lucena et al., 2012). The gills were rapidly diced and homogenized in a Potter  
226 homogenizer (600 rpm) in the homogenization buffer (20 mL buffer/g wet tissue). After  
227 centrifuging the crude extract at 20,000  $\times g$  for 35 min at 4 °C, the supernatant was placed on  
228 crushed ice and the pellet was resuspended in an equal volume of homogenization buffer.  
229 After further centrifugation as above, the two supernatants were gently pooled and centrifuged  
230 at 100,000  $\times g$  for 90 min at 4 °C. The resulting pellet containing the microsomal fraction was  
231 homogenized in buffer and 0.5-mL aliquots were rapidly frozen in liquid nitrogen and stored  
232 at  $-20$  °C. No appreciable loss of ( $\text{Na}^+$ ,  $\text{K}^+$ )-ATPase activity was seen after four-month's  
233 storage of the microsomal preparation. All experiments were performed using gill microsomal  
234 aliquots previously incubated with alamethicin (20  $\mu\text{g}/\text{mg}$  protein) for 10 min at 25 °C.  
235 Thawed aliquots were held in a crushed ice bath for no longer than 4 h.

236

237



## 238 **2.5. Measurement of protein concentration**

239 Protein concentration was estimated according to **Read and Northcote (1981)** using  
240 bovine serum albumin as the standard.

241

## 242 **2.6. Continuous-density sucrose gradient centrifugation**

243 An aliquot containing  $\approx 3.5$  mg protein of the microsomal preparation from crabs  
244 acclimated to 2, 8, 16, 25 or 35 ‰S was layered into a 10-50 % (w/v) continuous sucrose  
245 density gradient and centrifuged at  $180,000 \times g$  and  $4^\circ\text{C}$  for 3 h, using a Hitachi PV50T2  
246 vertical rotor. Fractions (0.5 mL) were collected from the bottom of the gradient and were  
247 analyzed for  $(\text{Na}^+, \text{K}^+)\text{-ATPase}$  activity and sucrose concentration.

248

## 249 **2.7. Measurement of hemolymph osmolality and $\text{Na}^+$ and $\text{Cl}^-$ concentrations**

250 Hemolymph samples from salinity-acclimated crabs were drawn through the arthroal  
251 membrane of the last pereopod with a #25-7 needle coupled to an insulin syringe, frozen and  
252 held at  $-20^\circ\text{C}$  until analysis. Hemolymph osmolality was measured in undiluted 10- $\mu\text{L}$   
253 aliquots using a vapor pressure micro-osmometer (Model 5500, Wescor Inc., USA).  $\text{Na}^+$   
254 concentration was measured after diluting the hemolymph samples by 1: 1,000 in 1% (v/v)  
255  $\text{HNO}_3$ , using an atomic absorption spectrophotometer (Shimadzu A-680). Chloride  
256 concentration was estimated in 10- $\mu\text{L}$  aliquots by titration against mercury nitrate, employing  
257 S-diphenylcarbazone as an indicator, using a microtitrator (Model E485, Metrohm AG,  
258 Switzerland) (**Santos and McNamara, 1996**).

259

## 260 **2.8. Measurement of $(\text{Na}^+, \text{K}^+)\text{-ATPase}$ activity**

261 Total ATPase activity was assayed at  $25^\circ\text{C}$  using a PK/LDH coupling system in  
262 which ATP hydrolysis was coupled to NADH oxidation (**Leone et al., 2015**). The oxidation  
263 of NADH was monitored at 340 nm ( $\epsilon_{340\text{nm}, \text{pH } 7.5} = 6200 \text{ M}^{-1} \text{ cm}^{-1}$ ) in a Shimadzu UV-1800  
264 spectrophotometer equipped with thermostatted cell holders. Standard conditions were 50  
265  $\text{mmol L}^{-1}$  HEPES buffer (pH 7.5) containing  $1 \text{ mmol L}^{-1}$  ATP (for 8 and 26 ‰S) or  $0.5 \text{ mmol}$   
266  $\text{L}^{-1}$  (for 2, 18 and 35 ‰S),  $3 \text{ mmol L}^{-1}$   $\text{MgCl}_2$  (for 26‰S) or  $2 \text{ mmol L}^{-1}$  (for 2 and 8‰S) or  $1$   
267  $\text{mmol L}^{-1}$  (for 18 and 35 ‰S),  $50 \text{ mmol L}^{-1}$   $\text{NaCl}$  (for 2 and 26‰S) or  $30 \text{ mmol L}^{-1}$  for 35‰S  
268 or  $20 \text{ mmol L}^{-1}$  (for 8 and 18‰S),  $10 \text{ mmol L}^{-1}$   $\text{KCl}$  (for 2, 18 and 35‰S) or  $20 \text{ mmol L}^{-1}$  for  
269 (8 and 26‰S),  $0.21 \text{ mmol L}^{-1}$  NADH  $3.18 \text{ mmol L}^{-1}$  PEP,  $82 \mu\text{g}$  PK (49 U),  $110 \mu\text{g}$  LDH (94  
270 U), plus the microsomal preparation (10-30  $\mu\text{L}$ ), in a final volume of 1 mL. ATP hydrolysis

271 also was estimated with 3 mmol L<sup>-1</sup> ouabain; the difference in activity measured without (total  
272 ATPase activity) or with ouabain (ouabain-insensitive ATPase activity) was considered to  
273 represent the (Na<sup>+</sup>, K<sup>+</sup>)-ATPase activity.

274 Controls without added enzyme were also included in each experiment to quantify  
275 non-enzymatic substrate hydrolysis. Initial velocities were constant for at least 15 min  
276 provided that less than 5% of the total NADH was oxidized. Neither NADH, PEP, LDH nor  
277 PK was rate-limiting over the initial course of the assay, and no activity could be measured in  
278 the absence of NADH. (Na<sup>+</sup>, K<sup>+</sup>)-ATPase activity was checked for linearity between 10-50 µg  
279 total protein; total microsomal protein added to the cuvette always fell well within the linear  
280 range of the assay. For each ATP concentration, reaction rate was estimated in duplicate using  
281 identical aliquots from the same preparation. The mean values from the duplicates were used  
282 to fit the corresponding saturation curves, each of which was repeated three times using a  
283 different microsomal homogenate (N= 3).

284

## 285 **2.9. Synthesis of [ $\gamma$ -<sup>32</sup>P]ATP**

286 Synthesis of [ $\gamma$ -<sup>32</sup>P]ATP was performed as described by [Walseth and Johnson \(1979\)](#)  
287 as modified by [Maia et al. \(1988\)](#).

288

## 289 **2.10. Extraction of pig kidney FXYD2 peptide**

290 Pig kidneys were obtained from a local abattoir and the outer medullas were dissected,  
291 homogenized and the purified (Na<sup>+</sup>, K<sup>+</sup>)-ATPase was prepared according to [Fontes et al.](#)  
292 [\(1999\)](#). The FXYD2 peptide was then prepared according to [Cortes et al. \(2006\)](#). Briefly,  
293 aliquots (≈1 mg protein) of purified (Na<sup>+</sup>, K<sup>+</sup>)-ATPase were diluted 16-fold at room  
294 temperature with a methanol (46%): chloroform (46%): ammonium bicarbonate (8%) mixture  
295 (v/v) adjusted to pH 7.5. The resulting suspension was centrifuged at 1,000 ×g for 1 min and  
296 the FXYD2-rich supernatant was dried at 40 °C in a heat block under a nitrogen stream. The  
297 dry residue was suspended in 300 µL of 50 mmol L<sup>-1</sup> HEPES buffer, pH 7.5, and the  
298 suspension was used to evaluate the effect of FXYD2 on (Na<sup>+</sup>, K<sup>+</sup>)-ATPase activity.

299

## 300 **2.11. Effect of FXYD2 peptide on gill (Na<sup>+</sup>, K<sup>+</sup>)-ATPase activity in salinity acclimated** 301 **crabs**

302 The effect of FXYD2 peptide on gill (Na<sup>+</sup>, K<sup>+</sup>)-ATPase activity of crabs acclimated to  
303 the different salinities was assayed by measuring the release of <sup>32</sup>Pi from [ $\gamma$ -<sup>32</sup>P]ATP as

304 described by Grubmeyer and Penefsky (1981) and Fontes et al. (1999). Before the reaction,  
305 aliquots containing 5  $\mu\text{g}$  of gill microsomal preparation (see section 2.4) from crabs  
306 acclimated to 2, 26 or 35 ‰ were incubated with 30  $\mu\text{L}$  FXYD2 peptide suspension  
307 prepared as above (1: 40 enzyme to FXYD2 ratio, v/v) at 25 °C. ATPase activity was  
308 estimated in 50  $\text{mmol L}^{-1}$  HEPES buffer (pH 7.5) under the same ionic conditions given  
309 above (see section 2.8) in a final volume of 0.5 mL. The reaction was started by adding 2  
310  $\text{mmol L}^{-1}$  ATP/ $[\gamma\text{-}^{32}\text{P}]\text{ATP}$  (specific activity 1,500 cpm/nmol). After 60 min at 25 °C, the  
311 reaction was stopped with 0.2 mL 0.4 M perchloric acid and the samples were held in a  
312 crushed ice bath. After adding 400  $\mu\text{L}$  of activated charcoal, the samples were centrifuged at  
313 700  $\times g$  for 5 min, and 0.5 mL aliquots (N=3) of the supernatant were collected and spotted  
314 onto a Whatman filter paper disk. The filter was dried and the  $^{32}\text{Pi}$  released was quantified by  
315 liquid scintillation counting in a Packard Tri-Carb 2100 LSC scintillation counter. Controls  
316 with acid-denatured enzyme were included in each experiment to quantify non-enzymatic  
317 substrate hydrolysis. All measurements were performed both without and with 3  $\text{mmol L}^{-1}$   
318 ouabain, the difference in activities being assumed to correspond to the ( $\text{Na}^+$ ,  $\text{K}^+$ )-ATPase  
319 activity.

320

## 321 **2.12. Effect of phosphorylation by endogenous protein kinases on gill microsomal ( $\text{Na}^+$ ,** 322 **$\text{K}^+$ )-ATPase activity**

323 Alamethicin-treated aliquots (see section 2.4) containing 100  $\mu\text{g}$  protein of the gill  
324 microsomal ( $\text{Na}^+$ ,  $\text{K}^+$ )-ATPase of crabs acclimated to the different salinities were assayed for  
325 phosphorylation by endogenous PKA, PKC and CaMK during 60 min. The reaction was  
326 started by adding 3 mM ATP and allowed to proceed for 60 min at 25 °C in 20  $\text{mmol L}^{-1}$   
327 HEPES buffer (pH 7.5), 10  $\text{mmol L}^{-1}$   $\text{MgCl}_2$ , 100  $\text{mmol L}^{-1}$  KCl, 1  $\text{mmol L}^{-1}$  EGTA and 1  
328  $\text{mmol L}^{-1}$  DTT in a final volume of 0.5 mL. For PKA, the phosphorylation reaction media  
329 also contained 0.05% Triton X-100, 2.5  $\text{mmol L}^{-1}$  dibutyryl cAMP and 3.5  $\mu\text{mol L}^{-1}$   
330 chelerythrine (PKC inhibitor). For PKC, 10  $\text{mmol L}^{-1}$   $\text{CaCl}_2$ , 80  $\mu\text{g}/\mu\text{L}$  phosphatidylserine,  
331 100  $\text{nmol L}^{-1}$  PMA (PKC stimulator) and 200  $\text{nmol L}^{-1}$  H-89 were added to the reaction  
332 media. For CaMK, phosphorylation was performed by adding 10  $\text{mmol L}^{-1}$   $\text{CaCl}_2$  and 200  
333  $\mu\text{g}/\mu\text{L}$  calmodulin to the reaction media. Controls were also performed as above with 200  
334  $\text{nmol L}^{-1}$  H-89 (PKA inhibitor), 3.5  $\mu\text{mol L}^{-1}$  chelerythrine (PKC inhibitor) and 2  $\mu\text{mol L}^{-1}$   
335 KN62 (CaMK inhibitor), respectively.

336 Aliquots (N= 3) containing 20  $\mu\text{g}$  protein of protein kinase-phosphorylated gill ( $\text{Na}^+$ ,  
337  $\text{K}^+$ )-ATPase were then assayed for ATPase activity in 50  $\text{mmol L}^{-1}$  HEPES buffer (pH 7.5)

338 under the same ionic conditions given above (see section 2.8) in a final volume of 0.5 mL.  
339 The reaction was started by adding 2 mM ATP/[ $\gamma$ - $^{32}$ P]ATP (specific activity 1,500 cpm/nmol)  
340 and allowed to proceed for a further 60 min, at 25 °C. The reaction was stopped by adding 0.2  
341 mL 0.4 M perchloric acid and the samples were placed in a crushed ice bath. After adding 0.4  
342 mL activated charcoal, the samples were centrifuged at 700  $\times$ g for 5 min and 0.5 mL of  
343 supernatant was collected and spotted onto a Whatman filter paper disk. The filter was dried  
344 and the  $^{32}$ Pi released was quantified by liquid scintillation counting in a Packard Tri-Carb  
345 2100 LSC liquid scintillation counter. Controls with acid-denatured enzyme were included in  
346 each experiment to quantify non-enzymatic substrate hydrolysis. All measurements were  
347 performed both without and with 3 mmol L $^{-1}$  ouabain, and the difference in activities was  
348 assumed to correspond to the (Na $^{+}$ , K $^{+}$ )-ATPase activity.

349

### 350 **2.13. SDS-PAGE analysis of the (Na $^{+}$ , K $^{+}$ )-ATPase $\alpha$ -subunit after phosphorylation by** 351 **endogenous protein kinases**

352 SDS-PAGE analyses of the protein kinase-phosphorylated proteins were performed  
353 according to Laemmli (1970), employing a 4% stacking gel and 15% resolution gel, under 60  
354 mA constant current. Aliquots of the gill microsomal preparation (20 or 40  $\mu$ g protein) were  
355 added to the phosphorylation reaction media (see section 2.12) and the reaction was started by  
356 adding 3 mM ATP/[ $\gamma$ - $^{32}$ P]ATP (specific activity 800,000 cpm/nmol). The reaction was  
357 stopped after 1 h by adding six volumes of electrophoresis buffer. The molecular markers in  
358 the gel were stained with colloidal Coomassie Blue, and after drying, the gel slab was  
359 autoradiographed for 24 h using a Cyclone Phosphor Imager apparatus (Perkin Elmer,  
360 Massachusetts). The images were produced by direct scanning using OptiQuant software and  
361 a proprietary storage phosphor screen.

362

### 363 **2.14. Estimation of kinetic parameters**

364 SigrafW software (Leone et al., 2005) was used to calculate the kinetic parameters  $V_M$   
365 (maximum velocity),  $K_{0.5}$  (apparent dissociation constant),  $K_M$  (Michaelis–Menten constant),  
366 and  $n_H$  (Hill coefficient) values for ATP hydrolysis at the different acclimation salinities. The  
367 kinetic parameters furnished in the tables are calculated values and represent the mean  $\pm$  SD  
368 derived from three different microsomal preparations (N= 3). SigrafW software can be  
369 obtained freely from <http://portal.ffclrp.usp.br/sites/fdaleone/downloads>.

370

### 371 **2.15. Statistical analyses and calculations**

372 Data for osmoregulatory parameters are given as the mean  $\pm$  SEM (N). After meeting  
373 the criteria for normality of distribution and equality of variance, the data sets were analyzed  
374 using one-way (acclimation salinity) or two-way (acclimation salinity, presence of FXYD2  
375 peptide) analyses of variance followed by the Student-Newman-Keuls multiple means  
376 comparison procedure to locate significant differences among treatments (SigmaPlot for  
377 Windows, version 11). Differences were considered significant at  $P=0.05$ .

378 To evaluate osmotic and ionic regulatory capability, hemolymph osmolalities and  
379  $[\text{Na}^+]$  and  $[\text{Cl}^-]$  were fitted to second order polynomial equations ( $Y = a_2x^2 + a_1x + a_0$ ) where the  
380 independent variable ( $x$ ) was the osmolality of the external media. The isosmotic and iso-  
381 ionic points, represented by the intercepts of the fitted curves with the isosmotic/iso-ionic  
382 lines, were calculated according to Freire et al. (2003). Hyper- and hypo-regulatory  
383 capabilities were expressed numerically as the ratio of change in hemolymph osmolality,  
384  $[\text{Na}^+]$  or  $[\text{Cl}^-]$  ( $\Delta$  hemolymph parameter) compared to that of the acclimation salinity ( $\Delta$   
385 medium parameter), below or above the isosmotic or iso-ionic points, respectively. A ratio  
386 close to '0' indicates excellent regulatory capability while values near '1' reveal a lack of  
387 regulatory ability (Freire et al., 2003).

388

### 389 3. RESULTS

#### 390 3.1. Hemolymph osmotic and ionic regulatory capability

391 *Ucides cordatus* was isosmotic ( $776 \pm 19$  mOsm  $\text{kg}^{-1}$   $\text{H}_2\text{O}$ ) after 10-days acclimation to  
392 26 ‰ (780 mOsm  $\text{kg}^{-1}$   $\text{H}_2\text{O}$ ), the reference salinity (Fig. 1). Salinity acclimation had no  
393 effect on hemolymph osmolality ( $P=0.126$ ). After acclimation to 2, 8, 18, 26 or 35 ‰,  
394 hemolymph osmolalities were  $692.2 \pm 49.4$ ,  $700.4 \pm 22.9$ ,  $720.2 \pm 85.1$ ,  $776.20 \pm 32.41$ , and  
395  $833.0 \pm 41.7$  mOsm  $\text{kg}^{-1}$   $\text{H}_2\text{O}$ , respectively (Fig. 1). Hyper-osmoregulatory capability  
396 ( $\Delta$  hemolymph osmolality/ $\Delta$  external osmolality) was 0.12, while hypo-osmoregulatory  
397 capability was 0.21, both revealing excellent osmoregulatory ability.

398 Hemolymph chloride was iso-ionic at 22 ‰ ( $352$  mmol  $\text{L}^{-1}$ ) and was hyper-regulated  
399 at 18 ( $364.0 \pm 29.9$  mmol  $\text{L}^{-1}$ ), 8 ( $304.0 \pm 17.2$  mmol  $\text{L}^{-1}$ ) and 2 ‰ ( $215.0 \pm 12.1$  mmol  $\text{L}^{-1}$ ), but  
400 hypo-regulated at 26 ( $340.0 \pm 23.3$  mmol  $\text{L}^{-1}$ ) and 35 ‰ ( $293.0 \pm 15.7$  mmol  $\text{L}^{-1}$ ) (Fig. 2).  
401 Chloride hyper-regulatory ability ( $\Delta$  hemolymph  $[\text{Cl}^-]/\Delta$  external  $[\text{Cl}^-]$ ) was 0.43, revealing  
402 moderate regulatory ability. Chloride hypo-regulatory ability was moderate at -0.28.

403 Hemolymph sodium was iso-ionic ( $500.4 \pm 11.0$  mmol  $\text{L}^{-1}$ ) at 35 ‰ ( $490$  mmol  $\text{L}^{-1}$ )  
404 and hyper-regulated at all lower salinities, decreasing to  $166.2 \pm 6.1$  mmol  $\text{L}^{-1}$  at 2 ‰,  
405 maintaining a  $\approx 6:1$  gradient against this medium ( $P < 0.001$ ) (Fig. 2). Hemolymph  $\text{Na}^+$

406 concentrations were comparable ( $P=0.108$ ) at 18 ‰ (434.8±29.8, gradient 1.7:1) and 26 ‰S  
407 (393.6±15.2, gradient 1.1:1). Sodium hyper-regulatory ability ( $\Delta$  hemolymph  $[Na^+]/\Delta$  external  
408  $[Na^+]$ ) was weak at 0.72. Clearly, *U. cordatus* can strongly hypo- and hyper-regulate its  
409 hemolymph osmolality and  $Cl^-$  concentration but only weakly regulates  $Na^+$  concentration.

410

### 411 3.2. Effect of acclimation salinity on gill ( $Na^+$ , $K^+$ )-ATPase activity

412 ( $Na^+$ ,  $K^+$ )-ATPase activities were very different in the gill homogenates from *U.*  
413 *cordatus* after 10-days acclimation to the different salinities. Activity was greatest  
414 (652.4±27.1 nmol Pi min<sup>-1</sup> mg<sup>-1</sup> protein) in crabs acclimated to the isosmotic salinity of 26  
415 ‰S (Fig. 3). Activities diminished by ≈50% at 18 ‰S (358.2±14.9 nmol Pi min<sup>-1</sup> mg<sup>-1</sup>  
416 protein) and 8 ‰S (304.9±15.2 nmol Pi min<sup>-1</sup> mg<sup>-1</sup> protein) and decreased markedly at 2 ‰S  
417 (24.3±1.2 nmol Pi min<sup>-1</sup> mg<sup>-1</sup> protein). Activity also decreased notably at 35 ‰S  
418 (45.9±2.3 nmol Pi min<sup>-1</sup> mg<sup>-1</sup> protein).

419

### 420 3.3. Effect of acclimation salinity on the modulation by ATP of gill ( $Na^+$ , $K^+$ )-ATPase 421 activity

422 Acclimation for 10 days to the different salinities markedly affected the modulation by  
423 ATP of gill ( $Na^+$ ,  $K^+$ )-ATPase activity (Fig. 4). A single saturation curve showing Michaelis-  
424 Menten characteristics was seen over a broad range of ATP concentrations ( $10^{-8}$  to  $10^{-3}$  mol  
425 L<sup>-1</sup>) for crabs acclimated at 2 ‰S, and maximum ( $Na^+$ ,  $K^+$ )-ATPase activity was calculated as  
426  $V_M=24.3\pm1.2$  nmol Pi min<sup>-1</sup> mg<sup>-1</sup> protein and  $K_M=29.0\pm2.5$  μmol L<sup>-1</sup> (Table 1). At 8 ‰S, a  
427 single saturation curve showing Michaelis-Menten characteristics also prevailed over the  
428 same ATP concentration range. In this case, maximum ( $Na^+$ ,  $K^+$ )-ATPase activity was  
429 calculated as  $V_M=304.9\pm15.2$  nmol Pi min<sup>-1</sup> mg<sup>-1</sup> protein) and  $K_M=79.1\pm4.7$  μmol L<sup>-1</sup>.

430

431 Acclimation to 18, 26 (reference salinity) and 35 ‰S resulted in more complex ATP  
432 saturation curves showing high (appearing at low ATP concentrations) and low affinity  
433 (appearing at high ATP concentrations) ATP-binding sites over the same ATP concentration  
434 range (inset to Fig. 4). Independently of salinity, the high affinity ATP sites showed  
435 cooperative kinetics with calculated  $K_{0.5}$  values of 0.068±0.005, 0.210±0.04 and 0.59±0.03  
436 μmol L<sup>-1</sup>, respectively. Except for crabs acclimated at 18 ‰S ( $K_M=20.1\pm0.9$  μmol L<sup>-1</sup>), the  
437 low-affinity ATP sites of those acclimated at 26 ( $K_{0.5}=18.6\pm1.1$  μmol L<sup>-1</sup>) and 35 ‰S ( $K_{0.5}=$   
438 29.1±2.5 μmol L<sup>-1</sup>) showed site-site interactions. Maximum gill ( $Na^+$ ,  $K^+$ )-ATPase activity  
439 calculated for the high affinity ATP sites of crabs acclimated at 18, 26 and 35 ‰S were  $V_M=$   
32.5±1.6,  $V_M=95.6\pm4.8$  and  $V_M=6.5\pm0.3$  nmol Pi min<sup>-1</sup> mg<sup>-1</sup> protein, respectively. The low



440 affinity ATP sites showed  $V_M = 325.7 \pm 18.3$ ,  $V_M = 556.8 \pm 22.3$  and  $V_M = 39.4 \pm 2.0$  and nmol Pi  
441  $\text{min}^{-1} \text{mg}^{-1}$  protein, respectively (Table 1). For the crabs acclimated to high salinities (18 to  
442 35 ‰), the calculated apparent dissociation constant ( $K_{0.5}$ ) increased with increasing  
443 salinity.

444

### 445 **3.4. Continuous-density sucrose gradient centrifugation**

446 The distribution profiles of the gill microsomal ( $\text{Na}^+$ ,  $\text{K}^+$ )-ATPase activities of *U.*  
447 *cordatus* acclimated to different salinities differed along the sucrose gradient (Fig. 5). At 2  
448 ‰, a broad ATPase activity peak lying between 20 and 45% sucrose, showing a heavy  
449 shoulder was seen. At 8 ‰, two well-defined activity peaks appeared between 25 and 35%  
450 sucrose (lighter fraction), and 35 and 45% sucrose (heavier fraction). At 18 ‰, only a single  
451 well-defined activity peak lying between 25 and 40% sucrose was seen. For the 26 and 35  
452 ‰-acclimated crabs, the ATPase activity peak was spread along the sucrose gradient.

453

### 454 **3.5. Effect of exogenous FXYD2 peptide on ( $\text{Na}^+$ , $\text{K}^+$ )-ATPase activity**

455 ( $\text{Na}^+$ ,  $\text{K}^+$ )-ATPase activity in the gills of crabs acclimated to 2 (hyper-osmotic  
456 condition), 26 (isosmotic, reference) or 35 ‰ (hypo-osmotic condition) for 10 days was  
457 stimulated differentially by the exogenous pig kidney FXYD2 peptide (Fig. 6 and Table 2).  
458 In the presence of FXYD2 peptide, ( $\text{Na}^+$ ,  $\text{K}^+$ )-ATPase activity of *U. cordatus* acclimated to 2,  
459 26 and 35 ‰ was stimulated 81, 22 and 30%, respectively. Compared to the isosmotic  
460 reference crabs, the ( $\text{Na}^+$ ,  $\text{K}^+$ )-ATPase activity of hyperosmotic crabs was 16-fold lower while  
461 that of hypoosmotic ones was only 10-fold lower.

462

### 463 **3.6. Effect of phosphorylation by endogenous protein kinases on gill ( $\text{Na}^+$ , $\text{K}^+$ )-ATPase** 464 **activity**

465 Protein kinases A, C and CaMK all inhibited the gill ( $\text{Na}^+$ ,  $\text{K}^+$ )-ATPase activity of *U.*  
466 *cordatus* acclimated to different salinities (Table 3). In the presence of dibutyryl cAMP (PKA  
467 stimulator), the activity of the isosmotic reference crabs (26 ‰) was inhibited by  $\approx 95\%$   
468 while that of 2 ‰ and 35 ‰-acclimated crabs was inhibited by  $\approx 50\%$  and  $\approx 35\%$ ,  
469 respectively. However, inhibition in the isosmotic crabs was  $\approx 90\%$ , and reversed by H89  
470 (PKA inhibitor). Similarly, inhibition was fully reversed in the hyper- (2 ‰) and hypo-  
471 osmoregulating (35 ‰) crabs. These data demonstrate that gill ( $\text{Na}^+$ ,  $\text{K}^+$ )-ATPase activity is  
472 regulated by PKA, independently of salinity.



473 In the presence of PMA (PKC stimulator), PKC also differentially inhibited gill ( $\text{Na}^+$ ,  
474  $\text{K}^+$ )-ATPase activity in the crabs acclimated to 2, 26 and 35 ‰S by  $\approx 35\%$ ,  $\approx 90\%$  and  $\approx 60\%$ ,  
475 respectively (Table 3). Chelerythrine (PKC inhibitor) notably reversed the inhibition seen in  
476 the 2 ‰S-acclimated ( $\approx 80\%$  recovery), and completely in the 35 ‰S-acclimated crabs.  
477 However, recovery of the ( $\text{Na}^+$ ,  $\text{K}^+$ )-ATPase activity was only 35% in the isosmotic crabs (26  
478 ‰S). These data suggest that the gill ( $\text{Na}^+$ ,  $\text{K}^+$ )-ATPase activity can be regulated by PKC in a  
479 salinity-dependent fashion.

480 Calmodulin, in the presence of calcium, also inhibited gill ( $\text{Na}^+$ ,  $\text{K}^+$ )-ATPase activity,  
481 due to stimulation of endogenous CaMK, in a salinity-dependent fashion. Inhibition was more  
482 pronounced in the isosmotic reference crabs ( $\approx 60\%$ ) than at 2 ( $\approx 30\%$ ) and 35 ‰S (25%).  
483 Activity was completely recovered in the presence of KN62 (specific CaMK inhibitor) in the  
484 hypo-osmoregulating (35 ‰S) crabs, but was only partially reversed in the isosmotic ( $\approx 65\%$   
485 recovery) and hyperosmotic crabs ( $\approx 75\%$ ). These data suggest that gill ( $\text{Na}^+$ ,  $\text{K}^+$ )-ATPase  
486 activity can be regulated by CaMK in a salinity-dependent fashion. This is the first  
487 demonstration of inhibitory phosphorylation of a crustacean ( $\text{Na}^+$ ,  $\text{K}^+$ )-ATPase by  
488  $\text{Ca}^{2+}$ /calmodulin-dependent kinase.

489

### 490 **3.7. SDS-PAGE autoradiography of ( $\text{Na}^+$ , $\text{K}^+$ )-ATPase subunits phosphorylated by** 491 **protein kinases**

492 Phosphorylation by endogenous PKA of the  $\alpha$ - and  $\gamma$ -subunits of the gill ( $\text{Na}^+$ ,  $\text{K}^+$ )-  
493 ATPase was greatest in the 2 ‰S-acclimated crabs (Fig. 7A, lanes 1 and 2) and less intense in  
494 the isosmotic reference crabs at 26 ‰S (Fig. 7A, lanes 4 and 5) and in those at 35 ‰S (Fig.  
495 7A, lanes 7 and 8). The PKA inhibitor H89 completely inhibited phosphorylation of these  
496 subunits in the 2 ‰S-acclimated crabs (Fig. 7A, lane 3), and to a lesser extent in the reference  
497 crabs (26 ‰S) (Fig. 7A, lane 6) and those in 35 ‰S (Fig. 7A, lane 9). Endogenous PKC also  
498 differentially phosphorylated the  $\alpha$ -subunit in the 35 ‰S- (Fig. 7B, lanes 7 and 8) and 26  
499 ‰S-acclimated crabs (Fig. 7B, lanes 4 and 5), and to a lesser extent in the 2 ‰S-acclimated  
500 crabs (Fig. 7B, lanes 1 and 2). Chelerythrine almost completely reversed phosphorylation of  
501 the  $\alpha$ -subunit in the 2 ‰S-acclimated crabs (Fig. 7B, lane 3), and partially in the 26 ‰S-  
502 (Fig. 7B, lane 6) and 35 ‰S-acclimated crabs (Fig. 7B, lane 9). Stimulation by calmodulin  
503 resulted in phosphorylation of the  $\alpha$ -subunit only in crabs acclimated to 35 ‰S (Fig. 7C,  
504 lanes 7 and 8), and to a lesser degree in the 26 ‰S-acclimated crabs (Fig. 7C, lanes 4 and 5).  
505 No phosphorylation of the  $\alpha$ -subunit was seen in the 2 ‰S-acclimated crabs (Fig. 7C, lanes 1

506 and 2). KN62 completely reversed  $\alpha$ -subunit phosphorylation in the 35 ‰-acclimated crabs  
507 (Fig. 7C, lane 9) but only partially in the reference crabs (Fig. 7C, lane 6).

508

### 509 **3.8. Effect of acclimation salinity on P-ATPase activities in the gill microsomal** 510 **preparation**

511 Salinity acclimation altered the amount of  $(\text{Na}^+, \text{K}^+)\text{-ATPase}$  activity present in the  
512 microsomal preparation (Table 4). Over the salinity range employed, ouabain inhibited 50 to  
513 85% of  $(\text{Na}^+, \text{K}^+)\text{-ATPase}$  activity. Systematic inhibition of the microsomal preparation using  
514 ouabain together orthovanadate disclosed considerable ( $\approx 50\%$ ), different P-ATPase activities  
515 in the ouabain-insensitive ATPase activity of crabs acclimated at 2 ‰; neutral phosphatases  
516 constituted the main P-ATPases. Inhibition using ouabain together with ethacrynic acid  
517 showed that 50-60% of the ouabain-insensitive ATPase activity consists of  $\text{Na}^+$ - or  $\text{K}^+$ -  
518 stimulated ATPase in crabs acclimated at 18, 26 and 35 ‰. High  $\text{V}(\text{H}^+)\text{-}$  and  $\text{Ca}^{2+}\text{-ATPase}$   
519 activities were detected in the ouabain-insensitive ATPase activity of crabs acclimated at 2  
520 ‰.

521

## 522 **4. DISCUSSION**

523 This investigation shows that the acclimation of *U. cordatus* to salinities from 2 to 35  
524 ‰ has a negligible effect on hemolymph osmolality, which is strongly hyper- and hypo-  
525 regulated. Hemolymph  $\text{Cl}^-$  and  $\text{Na}^+$  are less well regulated. At salinities above 18‰, the  
526 posterior gill  $(\text{Na}^+, \text{K}^+)\text{-ATPase}$  exhibits an additional high-affinity ATP binding site that  
527 corresponds to 10-20% of the total activity.  $(\text{Na}^+, \text{K}^+)\text{-ATPase}$  activity is stimulated by  
528 exogenous FXD2 peptide but phosphorylation by PKA, PKC and CaMK inhibits activity.  
529 The inhibition by CaMK is the first report of regulatory phosphorylation of the crustacean gill  
530  $(\text{Na}^+, \text{K}^+)\text{-ATPase}$ .

531 The different profiles of  $(\text{Na}^+, \text{K}^+)\text{-ATPase}$  activity revealed by sucrose gradient  
532 centrifugation may derive from their origin in membrane fragments with distinct lipid to  
533 protein ratios induced by salinity acclimation (Furriel et al., 2010; Lucena et al., 2012). The  
534 lipid environment affects  $(\text{Na}^+, \text{K}^+)\text{-ATPase}$  and other  $\text{P}_{\text{II}}$ -type ATPase activities such as the  
535  $\text{Ca}^{2+}\text{-ATPase}$  through physico-chemical interactions (Cornelius et al., 2015), and membrane  
536 lipid composition may affect membrane permeability influencing ion and water fluxes at low  
537 salinity (Long et al., 2019).

538 On osmotic challenge by acclimation to different salinities, *U. cordatus* strongly  
539 hyper-/hypo-regulates hemolymph osmolality and  $[Cl^-]$ , with  $[Na^+]$  being less regulated,  
540 revealing independent adjustment of these ions, as seen in other crustaceans (Freire et al.,  
541 2003; Kirschner, 2004; Faleiros et al., 2010). The crab's osmoregulatory abilities appear to  
542 sustain the use of a wide variety of habitats, including mangrove forests and intertidal areas.  
543 Some terrestrial and semi-terrestrial species like *Cardisoma carnifex* resist lengthy  
544 desiccation, showing only small changes in hemolymph  $Na^+$  (Wood et al., 1986). Semi-  
545 terrestrial crabs such as *U. cordatus* (Harris and Santos, 1993a), *Birgus latro* (Morris et al.,  
546 1991), *Gecarcinus lateralis* and *Ocypode quadrata* (Wolcott and Wolcott, 1985) can  
547 reprocess urine in their gill chambers reabsorbing urinary excreted salt across the gill  
548 epithelia. This ability likely reflects physiological adaptation to an environment in which  
549 salinity variation and periodic or complete emersion are frequent.

550 As crustacean hemolymph become isosmotic and iso-natremic at high salinities,  
551 mRNA transcription of the gill  $(Na^+, K^+)$ -ATPase  $\alpha$ -subunit is down regulated, resulting in  
552 reduced enzyme expression and activity (Luquet et al., 2005; Faleiros et al., 2018). The  
553 diminished gill  $(Na^+, K^+)$ -ATPase activity seen in *U. cordatus* at 35 ‰ is consistent with this  
554 finding and may account for the crab's inability to excrete  $Na^+$ , which is iso-ionic.  
555 Hemolymph  $Cl^-$ , however, is strongly hypo-regulated, evidently by a mechanism less  
556 dependent on the gill  $(Na^+, K^+)$ -ATPase such as the sodium-potassium two-chloride  
557 symporter (McNamara and Faria, 2012) or a  $Cl^-$ -stimulated ATPase (Gerencser, 1996).  
558 However, despite studies suggesting the participation of a  $Cl^-$ -stimulated ATPase, together  
559 with anion-coupled antiports and sodium-coupled symports, in the same membrane system,  
560 there is no direct evidence for primary, active  $Cl^-$  transport (for review see Gerencser, 1996).

561 Gill  $(Na^+, K^+)$ -ATPase activity also decreased progressively and markedly with  
562 acclimation to lower salinities (18, 8 and 2 ‰, see Fig. 3), which is unusual, since activities  
563 generally increase at low salinities, counterbalancing passive  $Na^+$  efflux (Lucu and Towle,  
564 2003; Luquet et al., 2005; Garçon et al., 2009; Antunes et al., 2017; Faleiros et al., 2018).  
565 This decrease may derive from our use of crabs acclimated under emerged rather than  
566 submerged conditions, with free access to their experimental media. Reprocessing of a largely  
567 isosmotic and iso-ionic urine by the gills in emerged crabs may be less demanding  
568 energetically than is ion uptake from hypo-osmotic media in submerged crabs (*i. e.*, against a  
569 6:1  $Na^+$  gradient in 2 ‰) requiring less  $(Na^+, K^+)$ -ATPase based transport activity. Hyper-  
570 osmoregulation in *U. cordatus* is clearly driven by a mechanism not primarily dependent on  
571 the  $(Na^+, K^+)$ -ATPase. Hemolymph  $Na^+$  and  $Cl^-$  uptake in dilute media may be maintained by

572 ion transporters like the  $\text{Na}^+/\text{H}^+$  and  $\text{Cl}^-/\text{HCO}_3^-$  antiporters, the  $\text{Na}^+/\text{K}^+/\text{2Cl}^-$  symporter, and a  
573  $\text{V}(\text{H}^+)$ -ATPase/apical  $\text{Na}^+$  channel arrangement (Kirschner, 2005; Genovese et al., 2005;  
574 Freire et al., 2008; McNamara and Faria, 2012).

575 The osmolality of crustacean hemolymph depends mainly on its  $\text{Na}^+$  and  $\text{Cl}^-$   
576 concentrations (Péqueux, 1995). In *U. cordatus* at 26 ‰S, hemolymph  $[\text{Na}^+]$  ( $\approx 390 \text{ mmol L}^{-1}$ )  
577 and  $[\text{Cl}^-]$  ( $\approx 340 \text{ mmol L}^{-1}$ ) account for  $\approx 94\%$  of osmolality ( $\approx 780 \text{ mOsm kg}^{-1} \text{ H}_2\text{O}$ ). At 2 ‰S,  
578  $[\text{Na}^+]$  ( $\approx 170 \text{ mmol L}^{-1}$ ) and  $[\text{Cl}^-]$  ( $\approx 220 \text{ mmol L}^{-1}$ ) contribute just 56% ( $\approx 692 \text{ mOsm kg}^{-1} \text{ H}_2\text{O}$ )  
579 to osmolality (see Figs. 1 and 2). Osmolytes other than  $\text{Na}^+$  and  $\text{Cl}^-$ , such as free amino acids  
580 (Augusto et al., 2007) and  $\text{NH}_4^+$ , may sustain the elevated hemolymph osmolality in dilute  
581 media, further reducing  $(\text{Na}^+, \text{K}^+)\text{-ATPase}$  activity and dependence on  $\text{Na}^+$ . Antennal gland  
582  $(\text{Na}^+, \text{K}^+)\text{-ATPase}$  activity increases in *U. cordatus* acclimated to low salinity (Harris and  
583 Santos, 1993b), suggesting augmented ion reabsorption from the urine.

584 SDS-PAGE autoradiography confirmed the phosphorylation by PKA of the  $(\text{Na}^+, \text{K}^+)\text{-}$   
585 ATPase  $\alpha$ - and  $\gamma$ -subunits in hyper-osmoregulating crabs (see Fig. 7A, lanes 1 and 2).

586 However, phosphorylation of the  $\gamma$ -subunit does not appear to contribute to overall  
587  $(\text{Na}^+, \text{K}^+)\text{-ATPase}$  activity. Despite the  $\approx 80\%$  increase in the presence of exogenous FXD2  
588 (see Table 2), this activity represents only  $\approx 6\%$  of  $(\text{Na}^+, \text{K}^+)\text{-ATPase}$  activity compared to  
589 isosmotic reference crabs (Fig. 6). PKA-induced inhibition was almost completely reverted by  
590 the inhibitor H89, suggesting that PKA may phosphorylate  $\alpha$ -subunit Ser<sub>943</sub> as seen in rat  
591 kidney COS cells (Cheng et al., 1997). The phosphorylation of the *U. cordatus* gill  
592 microsomal  $(\text{Na}^+, \text{K}^+)\text{-ATPase}$  by endogenous CaMK is a novel finding and is the first  
593 demonstration of inhibitory phosphorylation of a crustacean  $(\text{Na}^+, \text{K}^+)\text{-ATPase}$  by a  
594  $\text{Ca}^{2+}$ /calmodulin-dependent kinase. The differential abilities of the various kinases to  
595 phosphorylate their targets may derive from their expression levels, which may diverge under  
596 different salinity conditions, or from the availability of endogenous modulators, as seen in  
597 *Chasmagnathus granulata* (Halperin et al., 2004), *Callinectes sapidus* (Arnaldo et al., 2014)  
598 and *Litopenaeus vannamei* (Xu et al., 2016).

599  $(\text{Na}^+, \text{K}^+)\text{-ATPase}$  kinetic behavior was altered as a function of acclimation salinity  
600 (Fig. 4). Crabs acclimated to 2 and 8 ‰S exhibited typical Michaelis-Menten behavior,  $K_M$   
601 increasing  $\approx 3$ -fold and  $V_M \approx 15$ -fold in the latter salinity (Table 1). For 18-, 26- and 35 ‰S-  
602 acclimated crabs, in addition to the exposure of a high affinity ATP-binding site, the enzyme  
603 also showed allosteric behavior (Fig. 4 and inset). While the  $K_{0.5}$  of the low affinity ATP-  
604 binding site was unaltered with increasing acclimation salinity, binding by the high-affinity

605 site increased  $\approx 10$ -fold (Table 1). ( $\text{Na}^+$ ,  $\text{K}^+$ )-ATPase isoforms showing high and low affinity  
606 ATP-binding sites are present in many crustacean gill epithelia (Masui et al., 2002; Lucu and  
607 Towle, 2003; Leone et al., 2017; Farias et al., 2017). The non-exposure of the high affinity  
608 site after acclimation of *U. cordatus* to dilute media is similar to findings for the hermit crab  
609 *C. symmetricus* (Faleiros et al., 2018; and Antunes et al., 2017 as *C. vittatus*), the blue crab  
610 *Callinectes danae* (Masui et al., 2009) and the rock crab *Cancer pagurus* (Gache et al., 1976).  
611 ATP is considered to play both a catalytic and an allosteric role in the ( $\text{Na}^+$ ,  $\text{K}^+$ )-ATPase  
612 reaction cycle (Beaugé et al., 1997; Krumscheid et al., 2004), and high and low affinity ATP-  
613 binding sites on the ( $\text{Na}^+$ ,  $\text{K}^+$ )-ATPase are well known (Glynn, 1985; Ward and Cavieres,  
614 1998). However, despite the plethora of crystallographic data suggesting a binding site within  
615 the ( $\text{Na}^+$ ,  $\text{K}^+$ )-ATPase N-domain (Kanai et al., 2013; Nyblon et al., 2013; Chourasia and  
616 Sastry, 2012; Shinoda et al., 2009; Morth et al., 2007), its exact localization on the enzyme  
617 molecule remains an open question (Krumscheid et al., 2004; Morth et al., 2007). Regulatory  
618 phosphorylation by protein kinases can alter the kinetic profile of the host enzyme, e. g.,  
619 phosphorylation by PKA of liver phosphofructokinase II dramatically changes kinetic  
620 behavior in response to glucagon (Pilkis et al., 1988, 1995).

621 Small amphipathic peptides that carry the FXYP motif such as the FXYP1 to  
622 FXYP12 series are known to bind to and directly regulate P-type ATPases (Geering, 2006;  
623 Arystarkhova et al., 2007). The blue crab *Callinectes danae* was the first crustacean shown to  
624 express the FXYP2 subunit, a 6.5-kDa protein recognized by a  $\gamma$ C33 polyclonal anti-FXYP2  
625 antibody, phosphorylated by endogenous PKA (Silva et al., 2012). Phosphorylated pig kidney  
626 FXYP2 stimulates the *C. danae* gill ( $\text{Na}^+$ ,  $\text{K}^+$ )-ATPase by  $\approx 40\%$  (Silva et al., 2012).  
627 Similarly, the gill ( $\text{Na}^+$ ,  $\text{K}^+$ )-ATPase of 2-, 26- and 35 ‰S-acclimated *U. cordatus* also is  
628 stimulated by exogenous phosphorylated pig kidney FXYP2 peptide, being greater in hyper-  
629 ( $\approx 80\%$ ) than in hypo-osmoregulating crabs ( $\approx 30\%$ ) (Fig. 6, Table 3). The  $\approx 50\%$  activation by  
630 exogenous FXYP2 seen at both low and high salinities in *U. cordatus* (Fig. 6) is comparable  
631 to that for *C. danae* (Silva et al., 2012). Phosphorylation of endogenous FXYP2 peptide by  
632 endogenous PKA in *U. cordatus* was greatest at 2 ‰S (see Fig. 7) as seen in gills of the  
633 diadromous salmon *Salmo salar* (Tipsmark, 2008), euryhaline pufferfish *Tetraodon*  
634 *nigroviridis* (Wang et al., 2008), and the euryhaline milkfish *Chanos chanos* (Yang et al.,  
635 2019a), which express the FXYP11 isoform. While interaction of the FXYP11 peptide with  
636 the ( $\text{Na}^+$ ,  $\text{K}^+$ )-ATPase has been intensively investigated in fish gills (Tipsmark et al., 2010;  
637 Yang et al., 2013; Chang et al., 2016; Liang et al., 2017; Yang et al., 2019a), information on

638 the functional interaction of the FXYD2 peptide with the (Na<sup>+</sup>, K<sup>+</sup>)-ATPase is scant (Silva et  
639 al., 2012; Yang et al., 2019b). While the present study has revealed regulatory effects of the  
640 FXYD2 peptide, its role in the physiological acclimation of crustaceans to different salinities  
641 remains unclear.

642 Salinity acclimation affects not only (Na<sup>+</sup>, K<sup>+</sup>)-ATPase activity but also that of various  
643 ouabain-insensitive ATPases in the gill microsomal preparation (Table 4). Most activities  
644 decrease at low and high acclimation salinities compared to the isosmotic crabs. *Ucides*  
645 *cordatus* clearly exhibits a complex assemblage of osmoregulatory and enzymatic  
646 adjustments that sustain its osmotic homeostasis in response to salinity acclimation,  
647 particularly useful in a challenging, variable salinity environment like the mangrove forest  
648 habitat.

649

### 650 **Acknowledgements**

651 The authors thank the Instituto Chico Mendes de Conservação da Biodiversidade,  
652 Ministério do Meio Ambiente for authorization to collect *Ucides cordatus* under  
653 ICMBio/MMA permit #29594-9 to JCM. We also thank the Instituto Nacional de Ciência e  
654 Tecnologia para Adaptações da Biota Aquática da Amazônia (INCT-ADAPTA-II) with which  
655 this laboratory (FAL) is integrated, and the Rede de Camarão da Amazônia.

656

### 657 **Funding**

658 This investigation was financed by research grants from the Fundação de Amparo à  
659 Pesquisa do Estado de São Paulo (FAPESP 2013/22625-1 and 2016/25336-0), Conselho de  
660 Desenvolvimento Científico e Tecnológico (CNPq 470177/2008-0; CNPq 445078/2014-6)  
661 and in part by INCT ADAPTA II (465540/2014-7) and the Fundação de Amparo à Pesquisa  
662 do Estado do Amazonas (FAPEAM 062.1187/2017). MNL received a post-doctoral  
663 scholarship from FAPESP (2013/24252-9). FAL (302776/2011-7), CFLF (308847/2014-8),  
664 DPG (458246/2014-0) and JCM (303613/2017-3) received Excellence in Research  
665 scholarships from CNPq. LMF received a scholarship from the Coordenação de  
666 Aperfeiçoamento de Pessoal de Nível Superior (CAPES, Finance code 001).

667

### 668 **Compliance with Ethical Standards**

669 This study complies with all institutional, Brazilian and international guidelines on the  
670 use of invertebrate animals in scientific research.



671 **Conflict of interests**

672 No potential conflicts of interest were disclosed.

673

674 **Author contributions**

675 Preparation of biological material, and data collection and analyses were performed by  
676 Cintya M. Moraes, Leonardo M. Fabri, Malson N. Lucena, Rogério O. Faleiros, John C.  
677 McNamara and Carlos F.L. Fontes. The first draft and subsequent versions of the manuscript  
678 were written by Francisco A. Leone, John C. McNamara, Daniela P. Garçon and Leonardo M.  
679 Fabri. All authors participated in subsequent versions and read and approved the final version  
680 of the manuscript.

681

682 **LITERATURE CITED**

- 683 Albers R.W., 1967. Biochemical aspects of active transport. *Annu. Rev. Biochem.* 6, 727-756.
- 684 Antunes C.D., Lucena M.N., Garçon D.P., Leone F.A., McNamara J.C., 2017. Low salinity-  
685 induced alterations in epithelial ultrastructure, Na<sup>+</sup>/K<sup>+</sup>-ATPase immunolocalization and  
686 enzyme kinetic characteristics in the gills of the thinstripe hermit crab, *Clibanarius vittatus*  
687 (Anomura, Diogenidae). *J. Exp. Zool.* 327A, 380-397.
- 688 Arnaldo F.B., Villar V.A., Konkalmatt P.R., Owens S.A., Asico L.D., Jones J.E., Yang J.,  
689 Lovett D.L., Armando I., Jose P.A., Concepcion G.P., 2014. D1-like dopamine receptors  
690 downregulate Na<sup>+</sup>-K<sup>+</sup>-ATPase activity and increase cAMP production in the posterior gills  
691 of the blue crab *Callinectes sapidus*. *Am. J. Physiol.* 307, R634-R642.
- 692 Arystarkhova E., Donnet C., Muñoz-Matta A., Specht S.C., and Sweadner K.J., 2007.  
693 Multiplicity of expression of FXFD proteins in mammalian cells: dynamic exchange of  
694 phospholemman and gamma-subunit in response to stress. *Am. J. Physiol.* 292, C1179-  
695 C1191.
- 696 Augusto A., Greene L.J., Laure H.J., McNamara J.C., 2007. The ontogeny of isosmotic  
697 intracellular regulation in the diadromous, freshwater palaemonid shrimps, *Macrobrachium*  
698 *amazonicum* and *M. olfersi* (Decapoda). *J. Crust. Biol.* 27, 626-634.
- 699 Beaugé L.A., Gadsby D.C., Garrahan, P.J., 1997. Na/K-ATPase and related transport  
700 ATPases. Structure, mechanism and regulation. *Ann. NY Acad. Sci.* 834, 1-694.
- 701 Beguin P., Beggah A.T., Cotecchia S., Geering K., 1996. Adrenergic, dopaminergic, and  
702 muscarinic receptor stimulation leads to PKA phosphorylation of Na-K-ATPase. *Am. J.*  
703 *Physiol.* 270, C131-C137.



- 704 Beguin P., Beggah A.T., Chibalin A.V., Burgener-Kairuz P., Jaisser F., Mathews P.M.,  
705 Rossier B.C., Cotecchia S., Geering K., 1994. Phosphorylation of the Na,K-ATPase alpha-  
706 subunit by protein kinase A and C in vitro and in intact cells. Identification of a novel motif  
707 for PKC-mediated phosphorylation. *J. Biol. Chem.* 269, 24437-24445.
- 708 Belusa R., Wang Z.M., Matsubara T., Sahlgren B., Dulubova I., Nairn A.C., Ruoslahti E.,  
709 Greengard P., Aperia A., 1997. Mutation of the protein kinase C phosphorylation site on rat  
710 alpha1 Na<sup>+</sup>, K<sup>+</sup>-ATPase alters regulation of intracellular Na<sup>+</sup> and pH and influences cell  
711 shape and adhesiveness. *J. Biol. Chem.* 272, 20179-20184.
- 712 Blanco G., Sánchez G., Mercer R.W., 1998. Differential regulation of Na,K-ATPase isozymes  
713 by protein kinases and arachidonic acid. *Arch. Biochem. Biophys.* 359, 139-150.
- 714 Castilho P., Martins I.A., Bianchini A., 2001. Gill Na<sup>+</sup>,K<sup>+</sup>-ATPase and osmoregulation in the  
715 estuarine crab, *Chasmagnathus granulata* Dana, 1851 (Crustacea, Decapoda). *Mar. Ecol.*  
716 *Prog. Ser.* 229, 185-194.
- 717 Chang C.H., Yang W.K., Lin C.H., Kang C.K., Tang C.H., Lee T.H., 1996. FXYD11  
718 mediated modulation of Na<sup>+</sup>/K<sup>+</sup>-ATPase activity in gills of the brackish medaka (*Oryzias*  
719 *dancena*) when transferred to hypoosmotic or hyperosmotic environments. *Comp. Biochem.*  
720 *Physiol.* 194A, 19-26.
- 721 Cheng S.X., Aizman O., Nairn A.C., Greengard P., Aperia A., 1999. [Ca<sup>2+</sup>] determines the  
722 effects of protein kinases A and C on activity of rat renal Na<sup>+</sup>,K<sup>+</sup>-ATPase. *J. Physiol.* 518,  
723 37-46.
- 724 Cheng X.J., Fisone G., Aizman O., Aizman R., Levenson R., Greengard P., Aperia A., 1997.  
725 PKA-mediated phosphorylation and inhibition of Na<sup>+</sup>-K<sup>+</sup>-ATPase in response to beta-  
726 adrenergic hormone. *Am. J. Physiol.* 273, C893-C901.
- 727 Chourasia M., Sastry N., 2012. The Nucleotide, Inhibitor, and Cation Binding Sites of P-type  
728 II ATPases. *Chem. Biol. Drug Design* 79, 617–627.
- 729 Clausen M.V., Hilbers F., Poulsen H., 2017. The Structure and Function of the Na,K-ATPase  
730 Isoforms in Health and Disease. *Front. Physiol.* 8, 371.
- 731 Coelho P.A., Ramos R.A., 1972. A constituição e a distribuição da fauna de decápodos do  
732 litoral leste da América do Sul entre as latitudes 5° N e 39° S. *Trab. Oceanogr. Univ. Fed.*  
733 *PE* 13, 133-326.
- 734 Cornelius F., Habeck M., Kanai R., Toyoshima C., Karlisch S.J.D., 2015. General and specific  
735 lipid-protein interactions in Na,KATPase. *Biochim. Biophys. Acta* 1848, 1729-1743.

- 736 Cortes V.F., Ribeiro I.M., Barrabin H., Alves-Ferreira M., Fontes C.F., 2011. Regulatory  
737 phosphorylation of FXVD2 by PKC and cross interactions between FXVD2, plasmalemmal  
738 Ca-ATPase and Na,K-ATPase. Arch. Biochem. Biophys. 505, 75-82.
- 739 Cortes V.F., Veiga-Lopes F.E., Barrabin H., Alves-Ferreira M., Fontes C.F.L., 2006. The  
740 gamma subunit of Na<sup>+</sup>,K<sup>+</sup>-ATPase: Role on ATPase activity and regulatory phosphorylation  
741 by PKA. Int. J. Biochem. Cell Biol. 38, 1901-1913
- 742 Faleiros R.O., Garçon D.P., Lucena M.N., McNamara J.C., Leone F.A., 2018. Short- and  
743 long-term salinity challenge, osmoregulatory ability, and (Na<sup>+</sup>, K<sup>+</sup>)-ATPase kinetics and  $\alpha$ -  
744 subunit mRNA expression in the gills of the thinstripe hermit crab *Clibanarius symmetricus*  
745 (*Anomura*, *Diogenidae*). Comp. Biochem. Physiol. 225A, 16-25.
- 746 Faleiros R.O., Goldman M.H.S., Furriel R.P.M., McNamara J.C., 2010. Differential  
747 adjustment in gill Na<sup>+</sup>/K<sup>+</sup>- and V-ATPase activities and transporter mRNA expression  
748 during osmoregulatory acclimation in the cinnamon shrimp *Macrobrachium amazonicum*  
749 (*Decapoda*, *Palaemonidae*). J. Exp. Biol. 213, 3894-3905.
- 750 Farias D.L., Lucena N.M., Garçon D.P., Mantelatto F.L., McNamara J.C., Leone F.A., 2017.  
751 A kinetic characterization of the gill (Na<sup>+</sup>, K<sup>+</sup>)-ATPase from the semi-terrestrial mangrove  
752 crab *Cardisoma guanhumi* Latreille, 1825 (*Decapoda*, *Brachyura*). J. Membr. Biol. 250,  
753 517-534.
- 754 Fontes C.F.L., Lopes F.E.V., Scofano H.M., Barrabin H., Norby J.G., 1999. Stimulation of  
755 ouabain binding to Na, K-ATPase in 40% dimethyl sulfoxide by a factor from Na,K-ATPase  
756 preparations, Arch. Biochem. Biophys. 366, 215-223.
- 757 Forbush B.III, Kaplan J.H., Hoffman J.F. 1978. Characterization of a new photoaffinity  
758 derivative of ouabain: labeling of the large polypeptide and of a proteolipid component of  
759 the Na,K-ATPase. Biochem. 17, 3667-3676.
- 760 Freire C.A., Cavassin F., Rodrigues E.M., Torres A.H., McNamara J.C., 2003.  
761 Adaptive patterns of osmotic and ionic regulation, and the invasion of fresh water by the  
762 palaemonid shrimps. Comp. Biochem. Physiol. 136A, 771-778.
- 763 Freire C.A., Onken H., McNamara J.C., 2008. A structure-function analysis of ion transport  
764 in crustacean gills and excretory organs. Comp. Biochem. Physiol. 151A, 272-304
- 765 Furriel R.P.M., Firmino K.C.S., Masui D.C., Faleiros R.O., Torres A.H., McNamara J.C.,  
766 2010. Structural and biochemical correlates of (Na<sup>+</sup>, K<sup>+</sup>)-ATPase driven ion uptake across  
767 the gills of the true freshwater crab, *Dilocarcinus pagei* (*Brachyura*, *Trichodactylidae*). J.  
768 Exp. Zool. 313A, 508-523.

- 769 Gache C., Rossi B., Lazdunski M., 1976. (Na<sup>+</sup>, K<sup>+</sup>)-activated adenosine triphosphatase of  
770 axonal membranes, cooperativity and control. Eur. J. Biochem. 65, 293-306.
- 771 Garçon D.P., Masui D.C., Mantelatto F.L.M., Furriel R.P.M., McNamara J.C., Leone F.A.,  
772 2009. Hemolymph ionic regulation and adjustments in gill (Na<sup>+</sup>, K<sup>+</sup>)-ATPase activity during  
773 salinity acclimation in the swimming crab *Callinectes ornatus* (Decapoda, Brachyura).  
774 Comp. Biochem. Physiol. 154A, 44-55.
- 775 Geering K., 2001. The functional role of beta subunits in oligomeric P-type ATPases. J.  
776 Bioenerg. Biomembr. 33, 425-438.
- 777 Geering K., 2006 FXYD proteins: new regulators of Na-K-ATPase. Am. J. Physiol. 290,  
778 F241-F250.
- 779 Geering K., 2008. Functional roles of Na,K-ATPase subunits. Curr. Opinion Nephrol.  
780 Hyperten. 17, 526-532.
- 781 Genovese G., Luchetti C.G., Luquet C.M., 2004. Na<sup>+</sup>/K<sup>+</sup>-ATPase activity and gill  
782 ultrastructure in the hyper-hypo-regulating crab *Chasmagnathus granulatus* acclimated to  
783 dilute, normal, and concentrated seawater. Mar. Biol. 144, 111-118.
- 784 Genovese G., Ortiz N., Urcola M.R. and Luquet C.M., 2005. Possible role of carbonic  
785 anhydrase, V-H<sup>+</sup>-ATPase, and Cl-/HCO<sub>3</sub><sup>-</sup> exchanger in electrogenic ion transport across the  
786 gills of the euryhaline crab *Chasmagnathus granulatus*. Comp. Biochem. Physiol. 142A,  
787 362-369.
- 788 Gerencser G.A., 1996. The chloride pump: a Cl-translocating P-type ATPase. Crit. Rev.  
789 Biochem. Mol. Biol. 31, 303-337.
- 790 Glynn I.M., 1985. The (Na<sup>+</sup>, K<sup>+</sup>)-transporting adenosine triphosphatase In: Martonosi A.N.  
791 (ed.) The enzymes of biological membranes. Vol 3. Plenum Press, New York, pp 35-114
- 792 Grubmeyer C., Penefsky H.S., 1981. The presence of two hydrolytic sites on beef heart  
793 mitochondrial adenosine triphosphatase, J. Biol. Chem. 256, 3718-3727.
- 794 Halperin J., G. Genovese G., M. Tresguerres M., C.M. Luquet., 2004. Modulation of ion  
795 uptake across posterior gills of the crab *Chasmagnathus granulatus* by dopamine and  
796 cAMP. Comp. Biochem. Physiol. 139A, 103-109.
- 797 Harris R.R., Santos M.C.F., 1993a. Ionoregulatory and urinary responses to emersion in the  
798 mangrove crab *Ucides cordatus* and the intertidal crab *Carcinus maenas*. J. Comp. Physiol.  
799 163B, 18-27.
- 800 Harris R.R., Santos M.C.F., 1993b. Sodium uptake and transport (Na<sup>+</sup> + K<sup>+</sup>)-ATPase changes  
801 following Na<sup>+</sup> depletion and low salinity acclimation in the mangrove crab *Ucides cordatus*.  
802 Comp. Biochem. Physiol. 105A, 35-42.

- 803 Hartnoll R.G., 1988. Evolution, systematic and geographical distribution In: Burggren W.W.,  
804 McMahon B.R. (eds.) *Biology of Land Crabs*. Cambridge University Press, New York, pp  
805 6-51.
- 806 Henry R.P., Garrelts E.E., McCarty M.M., Towle D.W., 2002. Differential induction of  
807 branchial carbonic anhydrase and Na<sup>+</sup>/K<sup>+</sup> ATPase activity in the euryhaline crab, *Carcinus*  
808 *maenas*, in response to low salinity exposure. *J. Exp. Zool.* 292, 595-603.
- 809 Henry R.P., Lucu C., Onken H., Weihrauch D., 2012. Multiple functions of the crustacean  
810 gill: osmotic/ionic regulation, acid-base balance, ammonia excretion, and bioaccumulation  
811 of toxic metals. *Front. Physiol.* 3, 1-33.
- 812 Jiang Q., Garcia A., Han M., Cornelius F., Apell H.J., Khandelia H., Clarke R.J., 2017  
813 Electrostatic stabilization plays a central role in autoinhibitory regulation of the Na<sup>+</sup>,K<sup>+</sup>-  
814 ATPase. *Biophys. J.* 112, 288-299.
- 815 Kanai R., Ogawa H., Vilsen B., Cornelius F., Toyoshima C., 2013. Crystal structure of a Na<sup>+</sup>-  
816 bound Na<sup>+</sup>,K<sup>+</sup>-ATPase preceding the E1 state. *Nature* 502, 201-207.
- 817 Kaplan J.H., 2002. Biochemistry of Na,K-ATPase. *Annu. Rev. Biochem.* 71, 511-35.
- 818 Kazanietz M.G., Caloca M.J., Aizman O., Nowicki S., 2001. Phosphorylation of the catalytic  
819 subunit of rat renal Na<sup>+</sup>, K<sup>+</sup>-ATPase by classical PKC isoforms. *Arch. Biochem. Biophys.*  
820 388, 74-80.
- 821 Kirschner L.B., 2004. The mechanism of sodium chloride uptake in hyperregulating aquatic  
822 animals. *J. Exp. Biol.* 207, 1439-1452.
- 823 Krumscheid R., Ettrich R., Sovova Z., Susankova K., Lansky Z., Hofbauerova K., Linnertz H.,  
824 Teisinger J., Amler E.D., Schoner W., 2004. The phosphatase activity of the isolated H-4-H-5  
825 loop of Na, K-ATPase residues outside its ATP binding site. *Eur. J. Biochem.* 271, 3923-3936.
- 826 Laemmli U.K., 1970. Cleavage of structural proteins during the assembly of the head of  
827 bacteriophage T4. *Nature* 227, 680-685.
- 828 Lee C.E., Kiergaard M., Gelembiuk G.W., Eads B.D., Posavi M., 2011. Pumping ions: rapid  
829 parallel evolution of ionic regulation following habitat invasions. *Evolution* 65, 2229-2244
- 830 Leone F.A., Baranauskas J.A., Furriel R.P.M., Borin I.A., 2005. SigrafW: An easy-to-use  
831 program for fitting enzyme kinetic data. *Biochem. Mol. Biol. Edu.* 33, 399-403.
- 832 Leone, F.A., Garçon D.P., Lucena M.N., Faleiros R.O., Azevedo S.V., Pinto M.R., McNamara  
833 J.C., 2015. Gill-specific (Na<sup>+</sup>, K<sup>+</sup>)-ATPase activity and  $\alpha$ -subunit mRNA expression during  
834 low-salinity acclimation of the ornate blue crab *Callinectes ornatus* (Decapoda, Brachyura).  
835 *Comp. Biochem. Physiol.* 186B, 59-67.

- 836 Leone F.A., Lucena M.N., Garçon D.P., Pinto M.R., McNamara J.C., 2017. Gill ion transport  
837 ATPases and ammonia excretion in aquatic crustaceans. In: Weihrauch D., O'Donnell M.J.  
838 (eds.) Acid-Base Balance and Nitrogen Excretion in Invertebrates. Springer International  
839 Publishing AG, Cham, Switzerland. pp. 61-108.
- 840 Liang F.F., Li L., Zhang G.S., Yin S.W., Wang X.L., Li P., Jia Y.H., Wang Y.Y., Wang L.,  
841 Wang X.J., 2017. Na<sup>+</sup>/K<sup>+</sup>-ATPase response to salinity change and its correlation with  
842 FXVD11 expression in *Anguilla marmorata*. *J. Comp. Physiol.* 187B, 973-984.
- 843 Long X., Wu X., Zhu S., Ye H., Cheng Y., Zeng C., 2019. Salinity can change the lipid  
844 composition of adult *Chinese mitten* crab after long-term salinity adaptation. *Plos One* 14(7):  
845 e0219260.
- 846 Lovett D.L., Colella T., Cannon A.C., Lee H., Evangelisto A., Muller E.M., Towle D.W.,  
847 2006b. Effect of salinity on osmoregulatory patch epithelia in gills of the blue crab  
848 *Callinectes sapidus*. *Biol. Bull.* 210, 132-139.
- 849 Lovett D.L., Verzi M.P., Burgents J.E., Tanner C.A., Glomski K., Lee J.J., Towle D.W.,  
850 2006a. Expression profiles of Na<sup>+</sup>,K<sup>+</sup>-ATPase during acute and chronic hypo-osmotic stress  
851 in the blue crab *Callinectes sapidus*. *Biol. Bull.* 211, 58-65.
- 852 Lu F.M., Deisl C., Hilgemann D.W., 2016. Profound regulation of Na/K pump activity by  
853 transient elevations of cytoplasmic calcium in murine cardiac myocytes. *eLife* 5: e19267.  
854 <http://dx.doi.org/10.7554/eLife.19267.001>.
- 855 Lucena M.N., Garçon D.P., Mantelatto F.L.M., Pinto M.R., McNamara J.C., Leone F.A.,  
856 2012. Hemolymph ion regulation and kinetic characteristics of the gill (Na<sup>+</sup>,K<sup>+</sup>)-ATPase in  
857 the hermit crab *Clibanarius vittatus* (Decapoda Anomura) acclimated to high salinity.  
858 *Comp. Biochem. Physiol.* 161B, 380-391.
- 859 Lucu C., Towle D.W., 2003. (Na<sup>+</sup>, K<sup>+</sup>)-ATPase in gills of aquatic crustacea. *Comp. Biochem.*  
860 *Physiol.* 135A, 195-214.
- 861 Luquet C.M., Genovese G., Rosa G.A., Pellerano G.N., 2002. Ultrastructural changes in the  
862 gill epithelium of the crab *Chasmagnathus granulatus* (Decapoda: Grapsidae) in diluted and  
863 concentrated seawater. *Mar. Biol.* 141, 753-760.
- 864 Luquet C.M., Weihrauch D., Senek M., Towle D.W., 2005. Induction of branchial ion  
865 transporter mRNA expression during acclimation to salinity change in the euryhaline crab  
866 *Chasmagnathus granulatus*. *J. Exp. Biol* 208, 3627-3636.
- 867 Maia J.C.C., Gomes S.L., Juliani M.H., 1988. In: Morel C.M. (ed.) Genes and Antigens of  
868 Parasites - A Laboratory Manual (2nd ed.). Proceedings of an International Laboratory  
869 Training Course, Fundação Oswaldo Cruz, Rio de Janeiro, pp.151-155.

- 870 Martinez C.B., Alvares E.P., Harris R.R., Santos M.C., 1999. A morphological study on  
871 posterior gills of the mangrove crab *Ucides cordatus*. *Tissue Cell* 31, 380-389.
- 872 Masui D.C., Furriel R.P.M., McNamara J.C., Mantelatto F.L.M., Leone F.A., 2002.  
873 Modulation by ammonium ions of gill microsomal (Na<sup>+</sup>, K<sup>+</sup>)-ATPase in the swimming crab  
874 *Callinectes danae*: a possible mechanism for regulation of ammonia excretion. *Comp.*  
875 *Biochem. Physiol.* 132C, 471-482.
- 876 Masui D.C., Mantelatto F.L.M., McNamara J.C., Furriel R.P.M., Leone F.A., 2009. (Na<sup>+</sup>,  
877 K<sup>+</sup>)-ATPase activity in gill microsomes from the blue crab, *Callinectes danae*, acclimated to  
878 low salinity: Novel perspectives on ammonia excretion. *Comp. Biochem. Physiol.* 153A,  
879 141-148.
- 880 McNamara J.C., Faria S.C., 2012. Evolution of osmoregulatory patterns and gill ion transport  
881 mechanisms in the decapod Crustacea: a review. *J. Comp. Physiol.* 182B, 997-1014.
- 882 Meier S., Tavraz N.N., Dürr K.L., Friedrich T., 2010. Hyperpolarization-activated inward  
883 leakage currents caused by deletion or mutation of carboxy-terminal tyrosines of the  
884 Na<sup>+</sup>/K<sup>+</sup>-ATPase  $\alpha$ -subunit. *J. Gen. Physiol.* 135, 115-134.
- 885 Melo G.A.S., 1996. Manual de Identificação dos Brachyura (caranguejos e siris) do Litoral  
886 brasileiro, São Paulo. Editora Plêiade/FAPESP.
- 887 Mercer R.W., Biemensderfer D., Bliss D.P., Collins J.H., Forbush B. III., 1993. Molecular  
888 cloning and immunological characterization of the gamma polypeptide, a small protein  
889 associated with the Na, K-ATPase. *J. Cell Biol.* 121, 579-586.
- 890 Middleton D.A., Fedesova N.U., Esmann M., 2015. Long-range effects of Na<sup>+</sup> binding in  
891 Na,K-ATPase reported by ATP. *Biochem.* 54, 7041-7047.
- 892 Morris S., 2001. Neuroendocrine regulation of osmoregulation and the evolution of air-  
893 breathing in decapod crustaceans *J. Exp. Biol.* 204, 979-989.
- 894 Morth J.P., Poulsen H., Toustrup-Jensen M.S., Shack V.R., Egebjerg J., Andersen J.P., Vilsen  
895 B., Nissen P., 2009. The structure of the Na<sup>+</sup>,K<sup>+</sup>-ATPase and mapping of isoform  
896 differences and disease-related mutations. *Phil. Trans. Royal Soc.* 364B, 217-227.
- 897 Morth J.P., Pedersen B.P., Toustrup-Jensen M.S., Sorensen T.L.M., Petersen, J.P., Eersen, B.  
898 Vilsen B., Nissen, P., 2007. Crystal structure of the sodium–potassium pump. *Nature* 450,  
899 1043-1050.
- 900 Netticadan T., Kato K., Tappia P., Elimban V., Dhalla N.S., 1997. Phosphorylation of cardiac  
901 Na<sup>+</sup>-K<sup>+</sup> ATPase by Ca<sup>2+</sup>/calmodulin dependent protein kinase. *Biochem. Biophys. Res.*  
902 *Comm.* 238, 544-548.



- 903 Nyblom M., Poulsen H., Gourdon P., Reinhard I., Andersson M., 2013. Crystal structure of  
904  $\text{Na}^+$ ,  $\text{K}^+$ -ATPase in the  $\text{Na}^+$ -bound state. *Science* 342, 123-127.
- 905 Pearce L.R., Komander D., Alessi D.R., 2010. The nuts and bolts of AGC protein kinases.  
906 *Nat. Rev. Mol. Cell Biol.* 11, 9–22.
- 907 Nordhaus I., Diele K., Wolff M., 2009. Activity patterns, feeding and burrowing behaviour of  
908 the crab *Ucides cordatus* (Ucididae) in a high intertidal mangrove forest in North Brazil. *J.*  
909 *Exp. Mar. Biol. Ecol.* 374, 104–112.
- 910 Nordhaus I., Wolff M., 2007. Feeding ecology of the mangrove crab *Ucides cordatus*  
911 (Ocypodidae): food choice, food quality and assimilation efficiency. *Mar. Biol.* 151, 1665-  
912 1681.
- 913 Péqueux A., 1995. Osmotic regulation in crustaceans. *J. Crust. Biol.* 15, 1-60
- 914 Pilkis S.J., Claus T.H., Kurland I.J., Lange A.J., 1995. 6-Phosphofructo-2-kinase/fructose-2,6-  
915 biphosphatase: a metabolic signaling enzyme. *Annu. Rev. Biochem.* 64, 799-835.
- 916 Pilkis S.J., el-Maghrabi M.R., Claus T.H., 1988. Hormonal regulation of hepatic  
917 gluconeogenesis and glycolysis. *Ann. Rev. Biochem.* 57, 755-783.
- 918 Post R.L., Hegyvary C., Kume S., 1972. Activation by adenosine triphosphate in the  
919 phosphorylation kinetics of sodium and potassium ion transport adenosine triphosphatase. *J.*  
920 *Biol. Chem.* 247, 6530-6540.
- 921 Poulsen H., Morth P., Egebjerg J., Nissen P., 2010. Phosphorylation of the  $\text{Na}^+$ ,  $\text{K}^+$ -ATPase  
922 and the  $\text{H}^+$ ,  $\text{K}^+$ -ATPase. *FEBS Lett.* 584, 2589-2595
- 923 Read S.M., Northcote D.H., 1981. Minimization of variation in the response to different  
924 proteins of the Coomassie blue-G dye-binding assay for protein. *Anal. Biochem.* 116, 53-64.
- 925 Santos F.H., McNamara J.C., 1996. Neuroendocrine modulation of osmoregulatory  
926 parameters in the freshwater shrimp *Macrobrachium olfersii* (Wiegmann) (Crustacea,  
927 Decapoda). *J. Exp. Mar. Biol. Ecol.* 206, 109-120.
- 928 Santos, M.C.F., Salomão L.C., 1985a. Hemolymph osmotic and ionic concentrations in the  
929 gecarcinid crab *Ucides Cordatus*. *Comp. Biochem. Physiol.* 81A, 581-583.
- 930 Santos M.C.F., Salomão L.C., 1985b. Osmotic and cationic urine concentrations/ blood  
931 concentration ratios in hypo regulating *Ucides cordatus*. *Comp. Biochem, Physiol.* 81A,  
932 895-898.
- 933 Serrano L., K.M. Halanych K.M., Henry R.P., 2007. Salinity-stimulated changes in expression  
934 and activity of two carbonic anhydrase isoforms in the blue crab *Callinectes sapidus*. *J. Exp.*  
935 *Biol.* 210, 2320-2332.



- 936 Shinoda T., Ogawa H., Cornelius F, Toyoshima C., 2009. Crystal structure of the sodium-  
937 potassium pump at 2.4 Å resolution. *Nature* 459, 446-450.
- 938 Silva E.C.C., Masui D.C., Furriel R.P., McNamara J.C., Barrabin H., Scofano H.M., Perales  
939 J., Teixeira-Ferreira A., Leone F.A., Fontes C.F.L., 2012. Identification of a crab gill  
940 FXYD2 protein and regulation of crab microsomal Na,K-ATPase activity by mammalian  
941 FXYD2 peptide. *Biochim. Biophys. Acta* 1818, 2588-2597.
- 942 Silva E.C.C., Masui D.C., Furriel R.P.M., Mantelatto F.L.M., McNamara J.C., Barrabin H.,  
943 Leone F.A., Scofano H.M., Fontes C.F.L., 2008. Regulation by the exogenous polyamine  
944 spermidine of Na, K-ATPase activity from the gills of the euryhaline swimming crab  
945 *Callinectes danae* (Brachyura, Portunidae). *Comp. Biochem. Physiol.* 149B, 622-629.
- 946 Taylor H.H., Taylor E.W., 1992. Microscopic anatomy of invertebrates. In: Harrison F.W.,  
947 Humas A.G (eds.) *Decapod Crustacea*. Wiley-Liss, New York. 10, 203-293.
- 948 Tipsmark C.K., 2008. Identification of FXYD protein genes in a teleost: tissue-specific  
949 expression and response to salinity change. *Am. J. Physiol.* 294, R1367-R1378.
- 950 Tipsmark C.K., Mahmmoud Y.A., Borski R.J., Madsen S.S., 2010. FXYD-11 associates with  
951 Na<sup>+</sup>-K<sup>+</sup>-ATPase in the gill of Atlantic salmon: regulation and localization in relation to  
952 changed ion-regulatory status. *Am. J. Physiol.* 299, R1212-R1223.
- 953 Towle D.W., Kays W.T., 1986. Basolateral localization of Na<sup>+</sup>+K<sup>+</sup>-ATPase in gill epithelium  
954 of two osmoregulating crabs, *Callinectes sapidus* and *Carcinus maenas*. *J. Exp. Zool.* 239,  
955 311-318.
- 956 Walseth T.F., Johnson R.A., 1979. The enzymatic preparation of alpha [32P]nucleoside  
957 triphosphates, cyclic [32P]AMP and cyclic [32P]GMP. *Biochim. Biophys. Acta* 562, 11-31.
- 958 Wang P.J., Lin C.H., Hwang H.H., Lee T.H., 2008. Branchial FXYD protein expression in  
959 response to salinity change and its interaction with Na<sup>+</sup>/K<sup>+</sup>-ATPase of the euryhaline teleost  
960 *Tetraodon nigroviridis*. *J. Exp. Biol.* 211, 3750-3758.
- 961 Ward D.G., Cavieres J.D., 1998. Affinity labeling of two nucleotide sites on (Na<sup>+</sup>, K<sup>+</sup>)-  
962 ATPase using 2'(3')-O-(2,4,6-trinitrophenyl) 8-azidoadenosine 5'-[alpha-P-32] diphosphate  
963 (TNP-8N(3)-[alpha-P-32]ADP) as a photoactivatable probe Label incorporation before and  
964 after blocking the high affinity ATP site with fluorescein isothiocyanate. *J. Biol. Chem.* 273,  
965 33759-33765.
- 966 Wolcott T.G., Wolcott D.L., 1985. Extrarenal modification of urine for ion conservation in  
967 ghost crabs, *Ocypode-quadrata* (Fabricus). *J. Exp. Mar. Biol. Ecol.* 91, 93-107.

- 968 Wood C.M., Boutilier R.G., Randall D.J., 1986. The Physiology of dehydration stress in the  
969 land crab, *Cardisoma carnifex*: Respiration, ionoregulation, acid-base balance and  
970 nitrogenous waste excretion. J. Exp. Biol. 126, 271-296.
- 971 Xu C., Li E., Xu Z., Wang S., Chen K., Wang X., Li T., Qin J.G., Chen L., 2016. Molecular  
972 characterization and expression of AMP-activated protein kinase in response to low-salinity  
973 stress in the Pacific white shrimp *Litopenaeus vannamei*. Comp. Biochem. Physiol. 198B,  
974 79-90.
- 975 Yang W., Cha T., Chuang H., Hu Y., Lorin-Nebel C., Blondeau-Bidet E., Wu W., Tang C.,  
976 Tsai S., Lee T., 2019b. Gene expression of Na<sup>+</sup>/K<sup>+</sup>-ATPase  $\alpha$ -isoforms and FXYD proteins  
977 and potential modulatory mechanisms in euryhaline milkfish kidneys upon hypoosmotic  
978 challenges. Aquaculture 504, 59-69.
- 979 Yang W., Yang I., Chuang H., Chao T., Hu Y., Wu W., Wang Y., Tang C., Lee T., 2019a.  
980 Positive correlation of gene expression between branchial FXYD proteins and Na<sup>+</sup>/K<sup>+</sup>-  
981 ATPase of euryhaline milkfish in response to hypoosmotic challenges. Comp. Biochem.  
982 Physiol. 231A, 177-187
- 983 Yang W.K., Kang C.K., Chang C.H., Hsu A.D., Lee T.H., Hwang P.P., 2013. Expression  
984 profiles of branchial FXYD proteins in the brackish medaka *Oryzias dancena*: A potential  
985 saltwater fish model for studies of osmoregulation. PLoS One, 8, e55470
- 986 Yingst D.R., Ye-Hu J., Chen H., Barrett V., 1992. Calmodulin increases Ca-dependent  
987 inhibition of the Na,K-ATPase in human red blood cells. Arch. Biochem. Biophys. 295, 49-  
988 54.

989

## 990 LEGENDS TO THE FIGURES

991 **Figure 1. Hemolymph osmoregulatory capability in *Ucides cordatus* following hypo- or**  
992 **hyper-osmotic challenge for 10 days.**

993 Crabs were acclimated to 2, 8, 18, 26 (reference salinity) or 35 ‰ for 10 days. Osmolality  
994 was measured in 10- $\mu$ L aliquots of hemolymph taken from individual crabs. Data are the  
995 mean  $\pm$  SEM (N=5-10). The calculated isosmotic point is 776 mOsm kg<sup>-1</sup> H<sub>2</sub>O (1 ‰= 30  
996 mOsm kg<sup>-1</sup> H<sub>2</sub>O). When not visible, error bars are smaller than the symbols used.

997

998 **Figure 2. Regulation of Na<sup>+</sup> and Cl<sup>-</sup> concentrations in the hemolymph of *Ucides cordatus***  
999 **after 10-days acclimation to different salinities.**

1000 Crabs were acclimated to 2, 8, 18, 26 (reference salinity) or 35 ‰S for 10 days. Na<sup>+</sup> and Cl<sup>-</sup>  
1001 concentrations were measured in 10-μL hemolymph aliquots taken from individual crabs.  
1002 Data are the mean ± SEM (N=4-10). The isoionic points are 352 mmol L<sup>-1</sup> for chloride and  
1003 490 mmol L<sup>-1</sup> for sodium. 1 ‰S= 16 mmol L<sup>-1</sup> Cl<sup>-</sup> and 14 mmol L<sup>-1</sup> Na<sup>+</sup>, respectively.  
1004 \*P≤0.05 compared to reference salinity (26 ‰S); <sup>a</sup>P≤0.05 compared to immediately  
1005 preceding value for sodium curve; <sup>b</sup>P≤0.05 compared to immediately preceding value for  
1006 chloride curve (ANOVA, SNK).

1007

1008 **Figure 3. Effect of 10-days salinity acclimation on (Na<sup>+</sup>, K<sup>+</sup>)-ATPase activity in posterior**  
1009 **gill homogenates from *Ucides cordatus*.**

1010 For each salinity, activity was estimated as described in the Materials and Methods using 25,  
1011 10, 22, 20 or 28 μg protein in the assay reaction for 2, 8, 18, 26 or 35 ‰S, respectively. Mean  
1012 values of duplicate measurements were used to estimate (Na<sup>+</sup>, K<sup>+</sup>)-ATPase activity at each  
1013 salinity, which was repeated utilizing three different microsomal preparations (N= 3). Data  
1014 are the mean±SD. \*P≤0.05 compared to reference salinity (26 ‰S); <sup>a</sup>P≤0.05 compared to  
1015 immediately preceding value (ANOVA, SNK).

1016

1017 **Figure 4. Stimulation by ATP of posterior gill (Na<sup>+</sup>, K<sup>+</sup>)-ATPase activity in *Ucides***  
1018 ***cordatus* after 10-days acclimation to different salinities.**

1019 Activity was estimated as described in the Materials and Methods using 25, 10, 22, 20 or 28  
1020 μg protein in the assay reaction for 2, 8, 18, 26 or 35 ‰S, respectively. Mean values (±SD)  
1021 for the duplicates were used to fit each corresponding curve, which was repeated three times  
1022 using a different microsomal preparation (N= 3). (■) 2 ‰S, (●) 8 ‰S, (□) 18 ‰S, (▲) 26  
1023 ‰S, (○) 35 ‰S. **Inset:** Effect of salinity on high affinity ATP-binding sites, (□) 18 ‰S,  
1024 (▲) 26 ‰S, (○) 35 ‰S.

1025

1026

1027 **Figure 5. Sucrose density gradient centrifugation of (Na<sup>+</sup>, K<sup>+</sup>)-ATPase activity in a**  
1028 **posterior gill microsomal fraction from *Ucides cordatus* after 10-days acclimation to**  
1029 **different salinities.**

1030 An aliquot containing ≈3.5 mg protein of a microsomal preparation of gill tissue from *Ucides*  
1031 *cordatus* acclimated to each salinity was layered into a 10-50 % (w/w) continuous sucrose  
1032 density gradient and centrifuged at 180,000 ×g and 4 °C for 3 h. Fractions (0.5 mL) were

1033 collected from the bottom of the gradient and were analyzed for (Na<sup>+</sup>, K<sup>+</sup>)-ATPase activity  
1034 (●) and sucrose concentration (○).

1035

1036 **Figure 6. Stimulation by pig kidney FXYD2 peptide of posterior gill (Na<sup>+</sup>, K<sup>+</sup>)-ATPase**  
1037 **activity in *Ucides cordatus* after 10-days acclimation to different salinities.**

1038 (Na<sup>+</sup>, K<sup>+</sup>)-ATPase activity was estimated as described in the Materials and Methods using 5  
1039 µg protein from the microsomal fraction for each salinity and excess exogenous pig kidney  
1040 FXYD2 in the assay reaction. Mean values (±SD) for the duplicates were used to estimate the  
1041 (Na<sup>+</sup>, K<sup>+</sup>)-ATPase activity at each salinity, which was repeated three times using a different  
1042 microsomal preparation (N= 3). \*P≤0.05 and †P≤0.05 compared to reference value (26 ‰S)  
1043 without or with FXYD2, respectively; †P<0.05 compared to the same salinity without FXYD2  
1044 (two-way ANOVA, SNK). (□)- without FXYD2. (■)- with FXYD2.

1045

1046 **Figure 7. Phosphorylation of the posterior gill (Na<sup>+</sup>,K<sup>+</sup>)-ATPase by endogenous protein**  
1047 **kinases A and C and Ca<sup>2+</sup>/calmodulin-dependent protein kinase.**

1048 **A-** SDS-PAGE autoradiography of proteins in the gill microsomal fraction phosphorylated by  
1049 endogenous PKA. Lanes 1, 4 and 7: gill microsomal fraction (20 µg protein) from crabs  
1050 acclimated to 2, 26 or 35 ‰S, respectively, with 2.5 mmol L<sup>-1</sup> db-cAMP, a PKA activator.  
1051 Lanes 2, 5 and 8: gill microsomal fraction (40 µg protein) from crabs acclimated to 2, 26 or  
1052 35 ‰S, respectively, with 2.5 mmol L<sup>-1</sup> db-cAMP. Lanes 3, 6 and 9: gill microsomal fraction  
1053 (20 µg protein) from crabs acclimated to 2, 26 or 35 ‰S, respectively, with 200 nmol L<sup>-1</sup>  
1054 H89, a PKA inhibitor. **B-** SDS-PAGE autoradiography of proteins in the gill microsomal  
1055 fraction phosphorylated by endogenous PKC. Lanes 1, 4 and 7: gill microsomal fraction (20  
1056 µg protein) from crabs acclimated to 2, 26 or 35 ‰S, respectively, with 80 µg/µL  
1057 phosphatidylserine and 100 nmol L<sup>-1</sup> PMA, a PKC stimulator. Lanes 2, 5 and 8: gill  
1058 microsomal fraction (40 µg protein) from crabs acclimated to 2, 26 or 35 ‰S, respectively,  
1059 with 80 µg/µL phosphatidylserine and 100 nmol L<sup>-1</sup> PMA. Lanes 3, 6 and 9: gill microsomal  
1060 fraction (20 µg protein) from crabs acclimated to 2, 26 or 35 ‰S, respectively, with 3.5 µmol  
1061 L<sup>-1</sup> chelerythrine, a PKC inhibitor. **C-** SDS-PAGE autoradiography of proteins in the gill  
1062 microsomal fraction phosphorylated by endogenous Ca<sup>2+</sup>/calmodulin-dependent kinase. Lanes  
1063 1, 4 and 7: gill microsomal fraction (20 µg protein) from crabs acclimated to 2, 26 or 35 ‰S,  
1064 respectively, with 100 µg/µL calmodulin. Lanes 2, 5 and 8: gill microsomal fraction (40 µg  
1065 protein) from crabs acclimated to 2, 26 or 35 ‰S, respectively, with 100 µg/µL calmodulin.  
1066 Lanes 3, 6 and 9: gill microsomal fraction (20 µg protein) from crabs acclimated to 2, 26 or

1067 35 ‰, respectively, with 100  $\mu\text{g}/\mu\text{L}$  calmodulin and 2  $\mu\text{mol L}^{-1}$  KN62, a CaMK inhibitor.  
1068 Molecular weight markers (30 and 100 kDa, Magic Markers, ThermoFisher Scientific)  
1069 indicated at left of panel.  $\alpha$ -subunit,  $\approx 100$  kDa, FXVD2,  $\approx 7$  kDa).  
1070  
1071  
1072  
1073

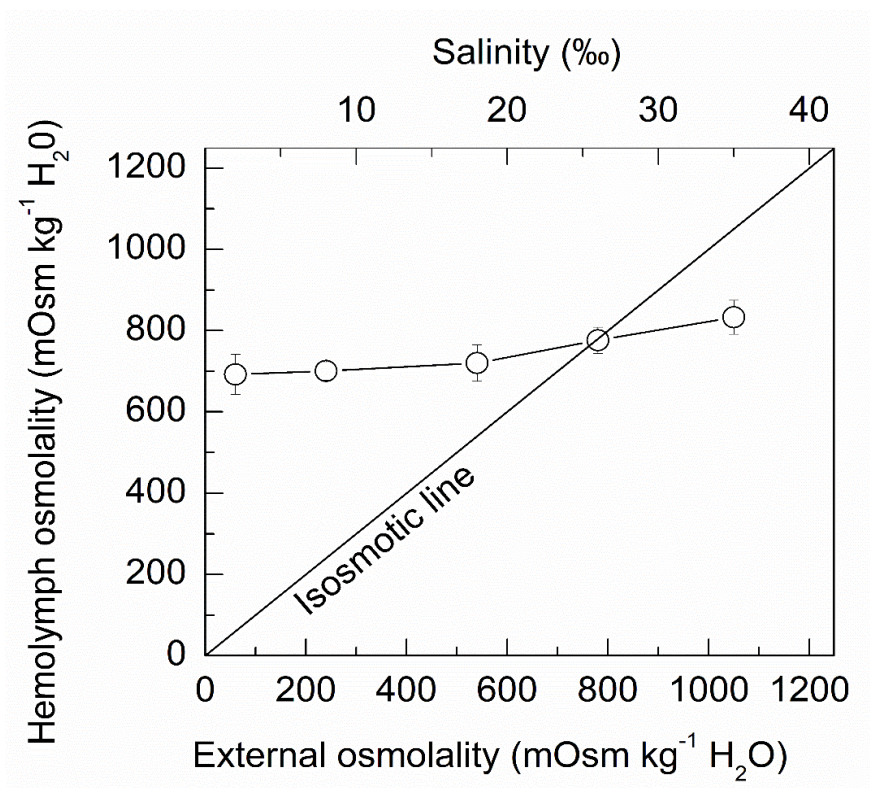

1074

1075

1076

**Figure 1**

1077

1078

1079

1080

1081

1082

1083

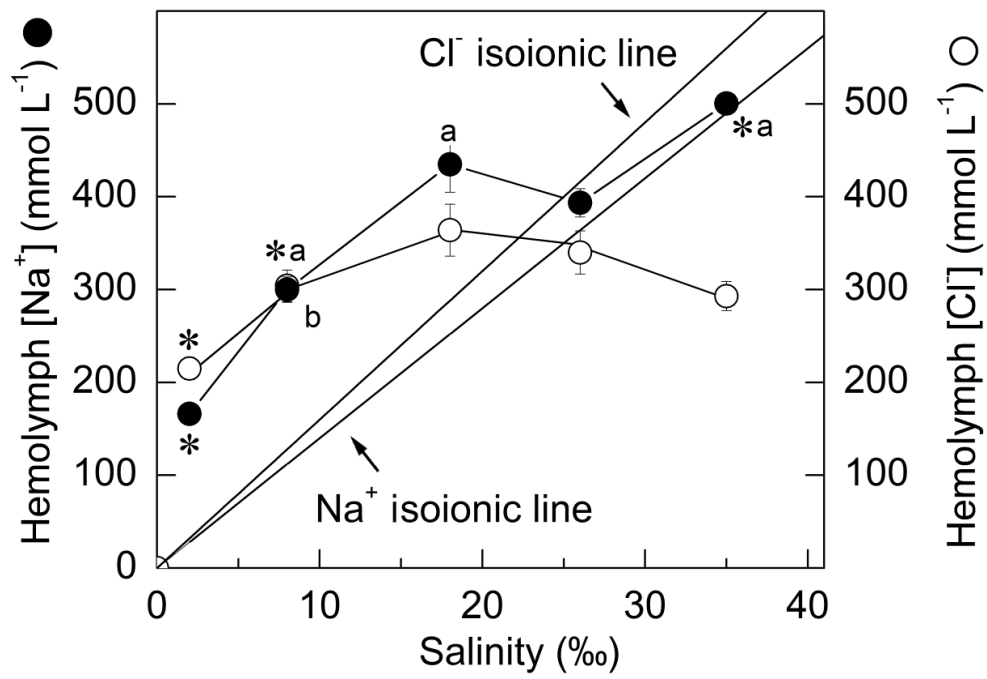

1084

1085

1086

**Figure 2**

1087

1088

1089



1090

1091

1092

1093

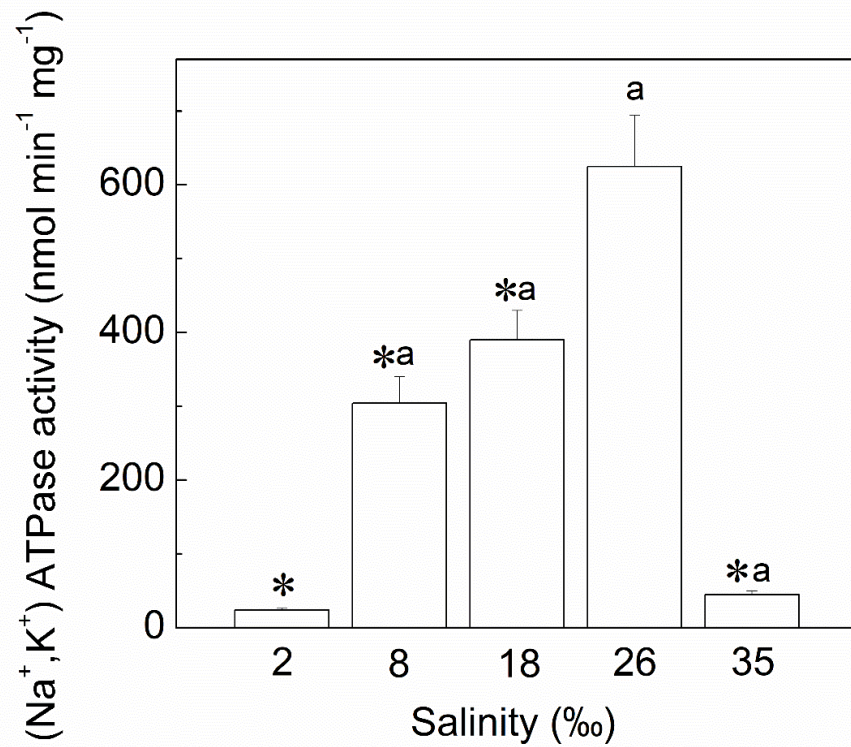

1094

1095

1096

**Figure 3**

1097

1098



1099

1100

1101

1102

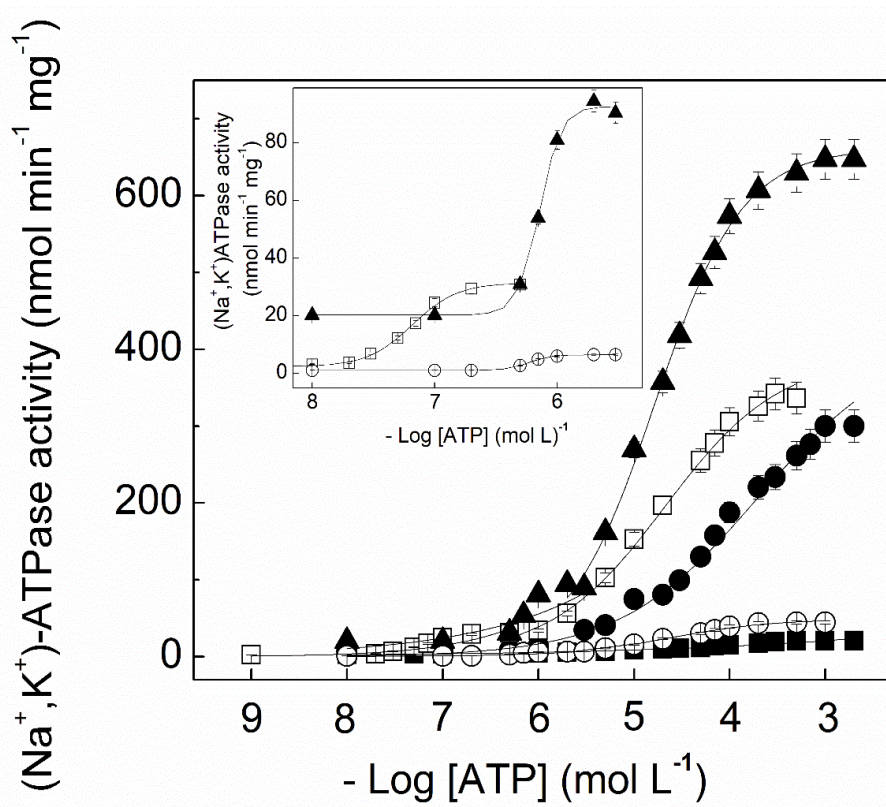

1103

1104

1105

1106

1107

**Figure 4**

1108

1109

1110

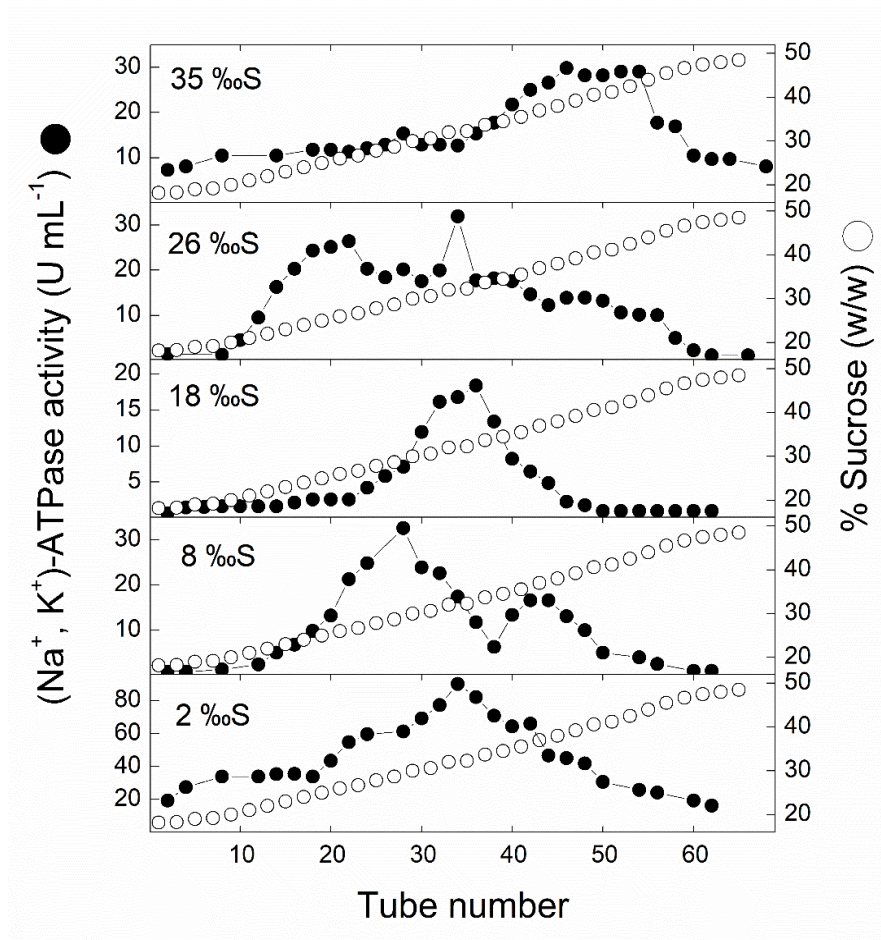

1111

1112

1113

1114

1115

**Figure 5**

1116

1117

1118

1119

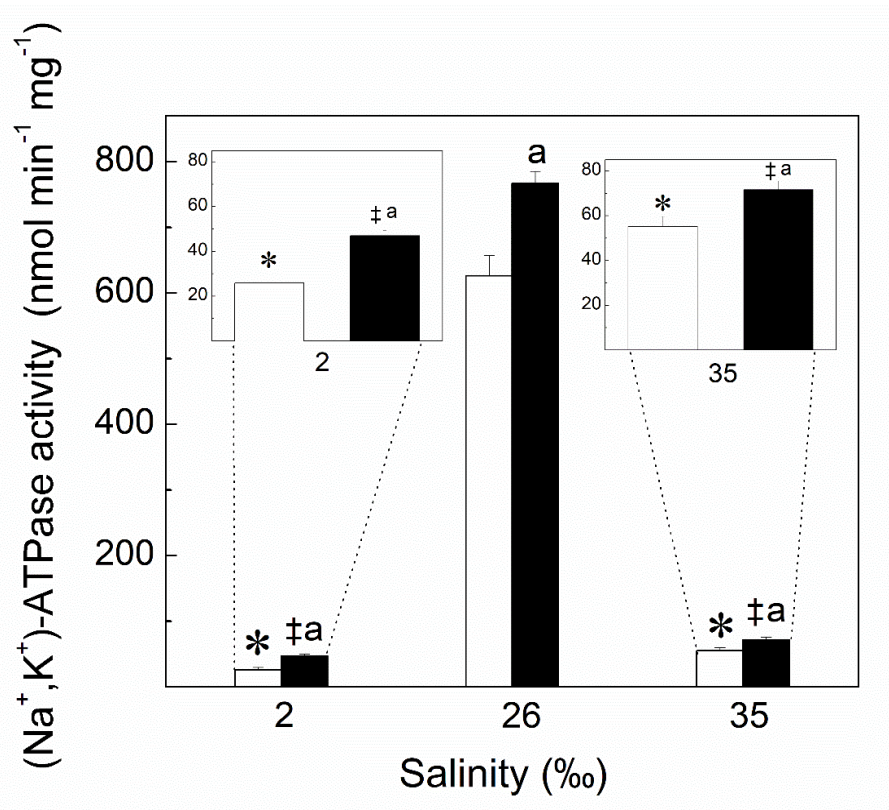

1120

1121

1122

**Figure 6**

1123

1124

1125

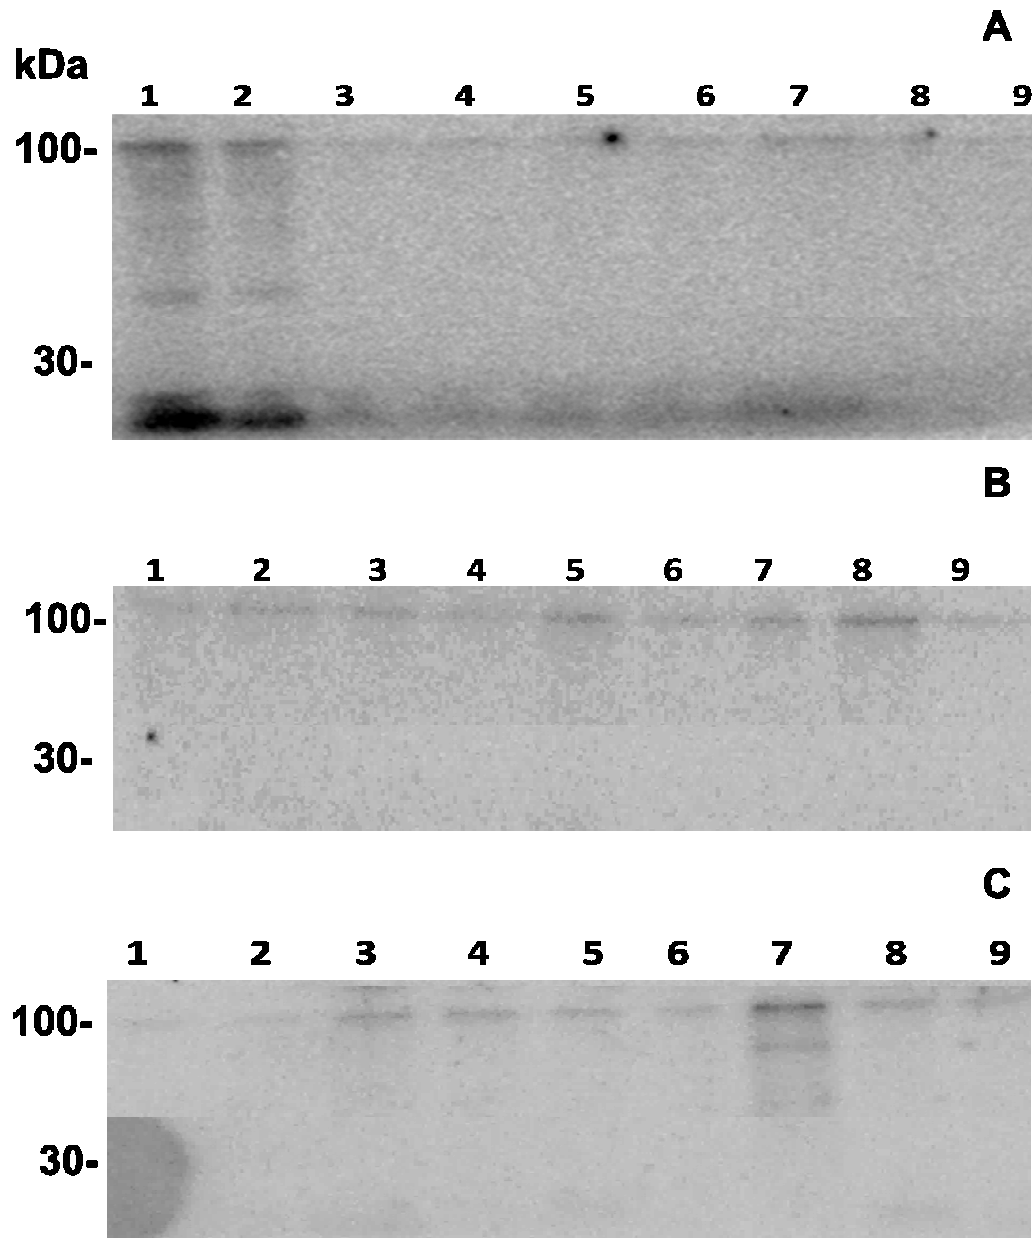

1126

1127

1128

1129

1130

1131

**Figure 7**

1132

1133

1134 **Table 1. Calculated kinetic parameters for the stimulation by ATP of posterior gill (Na<sup>+</sup>,**  
 1135 **K<sup>+</sup>)-ATPase activity in *Ucides cordatus* after 10-days acclimation to different salinities.**

1136

| Salinity<br>(‰S)         | V <sub>M</sub><br>(nmol min <sup>-1</sup> mg <sup>-1</sup> ) | K <sub>M</sub> or K <sub>0.5</sub><br>(μmol L <sup>-1</sup> ) | n <sub>H</sub> |
|--------------------------|--------------------------------------------------------------|---------------------------------------------------------------|----------------|
| 2                        | 24.3 ± 1.2                                                   | 29.0 ± 2.5                                                    | 1.1            |
| 8                        | 304.9 ± 15.2                                                 | 79.1 ± 4.7                                                    | 0.8            |
| 18                       | <sup>a</sup> 32.5 ± 1.6                                      | 0.068 ± 0.005                                                 | 2.2            |
|                          | <sup>b</sup> 325.7 ± 18.3                                    | 20.1 ± 0.9                                                    | 1.0            |
| 26 (isosmotic reference) | <sup>a</sup> 95.6 ± 4.8                                      | 0.210 ± 0.04                                                  | 3.2            |
|                          | <sup>b</sup> 556.8 ± 22.3                                    | 18.6 ± 1.1                                                    | 1.6            |
| 35                       | <sup>a</sup> 6.5 ± 0.3                                       | 0.59 ± 0.03                                                   | 4.8            |
|                          | <sup>b</sup> 39.4 ± 2.0                                      | 29.1 ± 2.5                                                    | 1.2            |

1137

<sup>a</sup>High affinity ATP-binding site; <sup>b</sup>Low affinity ATP-binding site.

1138

Data are the mean ± SD (N= 3).

1139

1140

1141

1142

1143

1144

1145 **Table 2. Effect of exogenous pig kidney FXYD2 peptide on posterior gill (Na<sup>+</sup>, K<sup>+</sup>)-**  
 1146 **ATPase activity in *Ucides cordatus* after 10-days acclimation to different salinities.**

1147

| Salinity (‰S)            | (Na <sup>+</sup> , K <sup>+</sup> )-ATPase activity (nmol min <sup>-1</sup> mg <sup>-1</sup> protein) |              |                 |
|--------------------------|-------------------------------------------------------------------------------------------------------|--------------|-----------------|
|                          | Control*                                                                                              | +FXYD2       | Stimulation (%) |
| 2                        | 25.9 ± 3.5                                                                                            | 47.0 ± 2.4   | 81.4            |
| 26 (isosmotic reference) | 626.3 ± 31.0                                                                                          | 767.4 ± 18.0 | 22.5            |
| 35                       | 55.2 ± 4.5                                                                                            | 71.6 ± 3.9   | 30.0            |

1148

Activity was estimated as described in the Materials and Methods using 5 μg of microsomal preparation and excess FXYD2 peptide. Data are the mean ± SD (N=3).

1149

\* (Na<sup>+</sup>, K<sup>+</sup>)-ATPase activity estimated without the FXYD2 peptide.

1150

**Table 3. Effect of protein kinases A and C and calmodulin on posterior gill (Na<sup>+</sup>, K<sup>+</sup>)-ATPase activity in *Ucides cordatus* after 10-days acclimation to different salinities.**

| Salinity (‰S)            | (Na <sup>+</sup> , K <sup>+</sup> )-ATPase activity (nmol min <sup>-1</sup> mg <sup>-1</sup> protein) |          |            |                 |                 |           |           |
|--------------------------|-------------------------------------------------------------------------------------------------------|----------|------------|-----------------|-----------------|-----------|-----------|
|                          | Control*                                                                                              | PKA      |            | PKC             |                 | CaMK      |           |
|                          |                                                                                                       | - H89    | + H89      | - Chelerythrine | + Chelerythrine | - KN62    | + KN62    |
| 2                        | 24.2±1.1                                                                                              | 12.1±1.0 | 22.53±0.1  | 15.9±0.2        | 19.0±0.3        | 17.5±0.3  | 18.1±1.8  |
| 26 (isosmotic reference) | 617.1±14.1                                                                                            | 35.6±5.5 | 539.64±7.7 | 72.3±7.6        | 220.5±3.2       | 265.9±2.4 | 406.3±3.8 |
| 35                       | 52.2±1.3                                                                                              | 35.3±2.1 | 60.9±3.7   | 21.6±2.0        | 56.6±1.7        | 38.1±2.3  | 56.2±5.2  |

\* (Na<sup>+</sup>, K<sup>+</sup>)-ATPase activity estimated without protein kinase stimulators (see section 2.12).



**Table 4. Effect of various inhibitors on total ATPase activity in a microsomal preparation from the posterior gills of *Ucides cordatus* after 10-days acclimation to different salinities.**

| Condition                                        | (Na <sup>+</sup> , K <sup>+</sup> )-ATPase activity (nmol min <sup>-1</sup> mg <sup>-1</sup> protein) |              |              |             |            | ATPase type likely present            |
|--------------------------------------------------|-------------------------------------------------------------------------------------------------------|--------------|--------------|-------------|------------|---------------------------------------|
|                                                  | 2 ‰S                                                                                                  | 8 ‰S         | 18 ‰S        | 26 ‰S*      | 35 ‰S      |                                       |
| Control                                          | 40.3 ± 2.5                                                                                            | 399.2 ± 20.0 | 412.2 ± 21.2 | 774.6 ± 2.3 | 59.3 ± 2.5 | Total ATPase                          |
| Ouabain (5 mmol L <sup>-1</sup> )                | 18.6 ± 1.6                                                                                            | 100.3 ± 5.0  | 58.5 ± 3.2   | 131.5 ± 3.4 | 14.8 ± 0.9 | (Na <sup>+</sup> , K <sup>+</sup> )-  |
| Orthovanadate (50 µmol L <sup>-1</sup> )         | 7.9 ± 1.0                                                                                             | 102.5 ± 4.6  | 58.4 ± 2.5   | 131.0 ± 2.2 | 14.8 ± 0.8 | P-ATPase                              |
| Ouabain + Orthovanadate                          | 8.2 ± 1.0                                                                                             | 100.6 ± 3.5  | 59.3 ± 3.8   | 128.5 ± 2.5 | 15.8 ± 1.0 | -                                     |
| Ouabain + 10 µmol L <sup>-1</sup> Aurovertin     | 9.2 ± 1.1                                                                                             | 31.3 ± 1.5   | 46.5 ± 2.5   | 46.7 ± 2.3  | 14.7 ± 0.9 | F <sub>0</sub> F <sub>1</sub> -       |
| Ouabain + 4 µmol L <sup>-1</sup> Bafilomycin     | 5.3 ± 0.8                                                                                             | 73.0 ± 2.9   | 42.7 ± 3.0   | 100.6 ± 3.5 | 10.5 ± 0.5 | V(H <sup>+</sup> )-                   |
| Ouabain + 2 mmol L <sup>-1</sup> Ethacrynic acid | 16.4 ± 1.7                                                                                            | 100.1 ± 5.2  | 24.2 ± 1.0   | 131.1 ± 1.5 | 6.8 ± 0.3  | Na <sup>+</sup> - or K <sup>+</sup> - |
| Ouabain + 5 mmol L <sup>-1</sup> Theophylline    | 7.2 ± 1.1                                                                                             | 97.3 ± 4.3   | 55.1 ± 2.6   | 126.8 ± 1.1 | 14.7 ± 0.8 | NP*                                   |
| Ouabain + 0.5 µmol L <sup>-1</sup> Thapsigargin  | 4.2 ± 0.8                                                                                             | 100.7 ± 3.8  | 55.6 ± 1.8   | 127.3 ± 0.8 | 15.2 ± 0.9 | Ca <sup>2+</sup>                      |
| Ouabain + 1 mmol L <sup>-1</sup> EGTA            | 5.1 ± 0.6                                                                                             | 99.1 ± 2.9   | 56.8 ± 3.0   | 126.5 ± 1.0 | 14.3 ± 0.8 | Ca <sup>2+</sup>                      |
| Ouabain + 20 µL Ethanol                          | 19.7 ± 2.4                                                                                            | 100.8 ± 5.4  | 61.3 ± 4.9   | 130.2 ± 1.8 | 14.1 ± 0.7 | -                                     |
| Ouabain + 20 µL DMSO                             | 18.6 ± 2.0                                                                                            | 99.9 ± 4.7   | 62.7 ± 5.23  | 130.6 ± 0.9 | 14.7 ± 0.6 | -                                     |

\*NP= neutral phosphatases. Data are the mean ± SD (N=3). \*26 ‰S represents the isosmotic reference salinity.
